# Supplementary material for: Small molecule modulation of microbiota: a systems pharmacology perspective
Source: BMC Bioinformatics. 2022 Sep 29;23(Suppl 3):403. doi: 10.1186/s12859-022-04941-2 (PMC9523894; doi:10.1186/s12859-022-04941-2)
Supplement: Supplementary file 6 — Additional file 6. Table S5. Drugs that are found in both drug screen results using Drugbank database and that using STITCH database. [file 12859_2022_4941_MOESM6_ESM.csv]

DB02083	N,N-dimethylglycine	1118-68-9	experimental	FFDGPVCHZBVARC-UHFFFAOYSA-N	InChI=1S/C4H9NO2/c1-5(2)3-4(6)7/h3H2,1-2H3,(H,6,7)	CN(C)CC(O)=O	C4H9NO2	C01026		673.0	46507083.0	58251.0		DMG	653.0		FFDGPVCHZBVARC	176	673.0	dimethylglycine		FFDGPVCHZBVARC-UHFFFAOYSA-N
DB01067	Glipizide	29094-61-9	approved; investigational	ZJJXGWJIGJFDTL-UHFFFAOYSA-N	InChI=1S/C21H27N5O4S/c1-15-13-24-19(14-23-15)20(27)22-12-11-16-7-9-18(10-8-16)31(29,30)26-21(28)25-17-5-3-2-4-6-17/h7-10,13-14,17H,2-6,11-12H2,1H3,(H,22,27)(H2,25,26,28)	CC1=NC=C(N=C1)C(=O)NCCC1=CC=C(C=C1)S(=O)(=O)NC(=O)NC1CCCCC1	C21H27N5O4S		D00335	3478.0	46505865.0	5384.0	CHEMBL1073		3359.0	50012956.0	ZJJXGWJIGJFDTL	344	3478.0	Glipizide	Hypoglycemic Agents;Chemical Actions and Uses;Pharmacologic Actions;Physiological Effects of Drugs	ZJJXGWJIGJFDTL-UHFFFAOYSA-N
DB08809	Dichloroacetic Acid	79-43-6	approved; investigational	JXTHNDFMNIQAHM-UHFFFAOYSA-N	InChI=1S/C2H2Cl2O2/c3-1(4)2(5)6/h1H,(H,5,6)	OC(=O)C(Cl)Cl	C2H2Cl2O2	C11149		6597.0	175427097.0	36386.0	CHEMBL13960	TF4	10771217.0	227588.0	JXTHNDFMNIQAHM	331	6597.0	Dichloroacetic Acid		JXTHNDFMNIQAHM-UHFFFAOYSA-N
DB02123	Glycochenodeoxycholic Acid	640-79-9	experimental	GHCZAUBVMUEKKP-GYPHWSFCSA-N	InChI=1S/C26H43NO5/c1-15(4-7-22(30)27-14-23(31)32)18-5-6-19-24-20(9-11-26(18,19)3)25(2)10-8-17(28)12-16(25)13-21(24)29/h15-21,24,28-29H,4-14H2,1-3H3,(H,27,30)(H,31,32)/t15-,16+,17-,18-,19+,20+,21-,24+,25+,26-/m1/s1	C[C@H](CCC(=O)NCC(O)=O)[C@H]1CC[C@H]2[C@@H]3[C@H](O)C[C@@H]4C[C@H](O)CC[C@]4(C)[C@H]3CC[C@]12C	C26H43NO5	C05466		12544.0	46506300.0	36274.0	CHEMBL1552	CHO	12027.0	50375590.0	GHCZAUBVMUEKKP	341	12544.0	Glycochenodeoxycholic Acid	Specialty Uses of Chemicals;Surface-Active Agents;Detergents;Chemical Actions and Uses	GHCZAUBVMUEKKP-GYPHWSFCSA-N
DB02994	Cacodylic acid	75-60-5	experimental	OGGXGZAMXPVRFZ-UHFFFAOYSA-N	InChI=1S/C2H7AsO2/c1-3(2,4)5/h1-2H3,(H,4,5)	C[As](C)(O)=O	C2H7AsO2	C07308		2513.0	46507712.0	48765.0	CHEMBL1231644	CAD	2418.0		OGGXGZAMXPVRFZ	122	2513.0	Cacodylic Acid	Agrochemicals;Specialty Uses of Chemicals;Toxic Actions;Pesticides;Herbicides;Chemical Actions and Uses	OGGXGZAMXPVRFZ-UHFFFAOYSA-N
DB00262	Carmustine	154-93-8	approved; investigational	DLGOEMSEDOSKAD-UHFFFAOYSA-N	InChI=1S/C5H9Cl2N3O2/c6-1-3-8-5(11)10(9-12)4-2-7/h1-4H2,(H,8,11)	ClCCNC(=O)N(CCCl)N=O	C5H9Cl2N3O2	C06873	D00254	2578.0	46506980.0	3423.0	CHEMBL513		2480.0	50015950.0	DLGOEMSEDOSKAD	355	2578.0	Carmustine	Toxic Actions;Antineoplastic Agents, Alkylating;Pharmacologic Actions;Antineoplastic Agents;Molecular Mechanisms of Pharmacological Action;Noxae;Alkylating Agents;Chemical Actions and Uses;Therapeutic Uses	DLGOEMSEDOSKAD-UHFFFAOYSA-N
DB03106	scyllo-inositol	488-59-5	investigational	CDAISMWEOUEBRE-CDRYSYESSA-N	InChI=1S/C6H12O6/c7-1-2(8)4(10)6(12)5(11)3(1)9/h1-12H/t1-,2-,3+,4+,5-,6-	O[C@H]1[C@H](O)[C@@H](O)[C@H](O)[C@@H](O)[C@@H]1O	C6H12O6	C06153		892.0	46505198.0	10642.0	CHEMBL468154	2H3	10254646.0		CDAISMWEOUEBRE	98	892.0	scyllitol		CDAISMWEOUEBRE-UHFFFAOYSA-N
DB02731	Ethylmercurithiosalicylic acid	148-61-8	experimental	HXQVQGWHFRNKMS-UHFFFAOYSA-M	InChI=1S/C7H6O2S.C2H5.Hg/c8-7(9)5-3-1-2-4-6(5)10;1-2;/h1-4,10H,(H,8,9);1H2,2H3;/q;;+1/p-1	CC[Hg]SC1=CC=CC=C1C(O)=O	C9H10HgO2S			67361.0	46506518.0	33214.0		EMT	60691.0	50366032.0	HXQVQGWHFRNKMS	64	5441.0			HXQVQGWHFRNKMS-UHFFFAOYSA-L
DB02083	N,N-dimethylglycine	1118-68-9	experimental	FFDGPVCHZBVARC-UHFFFAOYSA-N	InChI=1S/C4H9NO2/c1-5(2)3-4(6)7/h3H2,1-2H3,(H,6,7)	CN(C)CC(O)=O	C4H9NO2	C01026		673.0	46507083.0	58251.0		DMG	653.0		FFDGPVCHZBVARC	1138	673.0	dimethylglycine		FFDGPVCHZBVARC-UHFFFAOYSA-N
DB08348	N~2~,N~2~-DIMETHYL-N~1~-(6-OXO-5,6-DIHYDROPHENANTHRIDIN-2-YL)GLYCINAMIDE		experimental	UYJZZVDLGDDTCL-UHFFFAOYSA-N	InChI=1S/C17H17N3O2/c1-20(2)10-16(21)18-11-7-8-15-14(9-11)12-5-3-4-6-13(12)17(22)19-15/h3-9H,10H2,1-2H3,(H,18,21)(H,19,22)	CN(C)CC(=O)NC1=CC2=C(NC(=O)C3=CC=CC=C23)C=C1	C17H17N3O2			4858.0	99444819.0		CHEMBL372303	P34	4692.0	27497.0	UYJZZVDLGDDTCL	499	4858.0	N-(oxo-5,6-dihydrophenanthridin-2-yl)-N,N-dimethylacetamide hydrochloride		UYJZZVDLGDDTCL-UHFFFAOYSA-N
DB03109	N-Acetyl-D-Allosamine		experimental	OVRNDRQMDRJTHS-UIAUGNHASA-N	InChI=1S/C8H15NO6/c1-3(11)9-5-7(13)6(12)4(2-10)15-8(5)14/h4-8,10,12-14H,2H2,1H3,(H,9,11)/t4-,5-,6-,7+,8-/m1/s1	[H][C@@]1(O)O[C@]([H])(CO)[C@@]([H])(O)[C@@]([H])(O)[C@@]1([H])N=C(C)O	C8H15NO6			445246.0	46505390.0			NAA	392939.0		OVRNDRQMDRJTHS	702	439174.0	Acetylglucosamine		OVRNDRQMDRJTHS-RTRLPJTCSA-N
DB01452	Diamorphine	561-27-3	approved; illicit; investigational	GVGLGOZIDCSQPN-PVHGPHFFSA-N	InChI=1S/C21H23NO5/c1-11(23)25-16-6-4-13-10-15-14-5-7-17(26-12(2)24)20-21(14,8-9-22(15)3)18(13)19(16)27-20/h4-7,14-15,17,20H,8-10H2,1-3H3/t14-,15+,17-,20-,21-/m0/s1	[H][C@@]12C=C[C@H](OC(C)=O)[C@@H]3OC4=C(OC(C)=O)C=CC5=C4[C@]13CCN(C)[C@@H]2C5	C21H23NO5	C06534	D07286	5462328.0	46506839.0	27808.0	CHEMBL459324		4575379.0		GVGLGOZIDCSQPN	1156	3592.0			GVGLGOZIDCSQPN-UHFFFAOYSA-N
DB02594	2'-Deoxycytidine	951-77-9	experimental; investigational	CKTSBUTUHBMZGZ-SHYZEUOFSA-N	InChI=1S/C9H13N3O4/c10-7-1-2-12(9(15)11-7)8-3-5(14)6(4-13)16-8/h1-2,5-6,8,13-14H,3-4H2,(H2,10,11,15)/t5-,6+,8+/m0/s1	NC1=NC(=O)N(C=C1)[C@H]1C[C@H](O)[C@@H](CO)O1	C9H13N3O4	C00881		13711.0	46508326.0	15698.0	CHEMBL66115	DCZ	13117.0	50367094.0	CKTSBUTUHBMZGZ	293	44721303.0			CKTSBUTUHBMZGZ-OHEWIBQUSA-N
DB03967	Dodecyl sulfate	151-41-7	experimental	MOTZDAYCYVMXPC-UHFFFAOYSA-N	InChI=1S/C12H26O4S/c1-2-3-4-5-6-7-8-9-10-11-12-16-17(13,14)15/h2-12H2,1H3,(H,13,14,15)	CCCCCCCCCCCCOS(O)(=O)=O	C12H26O4S			8778.0	46507629.0	45599.0		SDS	8448.0		MOTZDAYCYVMXPC	1279	8778.0	dodecyl sulfate	Chemical Actions and Uses;Specialty Uses of Chemicals;Surface-Active Agents	MOTZDAYCYVMXPC-UHFFFAOYSA-N
DB09220	Nicorandil	65141-46-0	approved; investigational	LBHIOVVIQHSOQN-UHFFFAOYSA-N	InChI=1S/C8H9N3O4/c12-8(7-2-1-3-9-6-7)10-4-5-15-11(13)14/h1-3,6H,4-5H2,(H,10,12)	[O-][N+](=O)OCCNC(=O)C1=CC=CN=C1	C8H9N3O4	C13280	D01810	47528.0	310265127.0	31905.0	CHEMBL284906		43240.0		LBHIOVVIQHSOQN	793	47528.0	Nicorandil	Chemical Actions and Uses;Vitamins;Antihypertensive Agents;Therapeutic Uses;Micronutrients;Growth Substances;Nutrients;Anti-Arrhythmia Agents;Pharmacologic Actions;Vasodilator Agents;Vitamin B Complex;Physiological Effects of Drugs;Cardiovascular Agents	LBHIOVVIQHSOQN-UHFFFAOYSA-N
DB03989	D-Allopyranose	2595-97-3	experimental	WQZGKKKJIJFFOK-IVMDWMLBSA-N	InChI=1S/C6H12O6/c7-1-2-3(8)4(9)5(10)6(11)12-2/h2-11H,1H2/t2-,3-,4-,5-,6?/m1/s1	OC[C@H]1OC(O)[C@H](O)[C@H](O)[C@@H]1O	C6H12O6	C01487		439507.0	46505989.0	4093.0	CHEMBL1222152	ALL	388604.0		WQZGKKKJIJFFOK	1444	439357.0	SHU 508	Chemical Actions and Uses;Contrast Media;Diagnostic Uses of Chemicals;Pharmacologic Actions;Specialty Uses of Chemicals	WQZGKKKJIJFFOK-PHYPRBDBSA-N
DB02123	Glycochenodeoxycholic Acid	640-79-9	experimental	GHCZAUBVMUEKKP-GYPHWSFCSA-N	InChI=1S/C26H43NO5/c1-15(4-7-22(30)27-14-23(31)32)18-5-6-19-24-20(9-11-26(18,19)3)25(2)10-8-17(28)12-16(25)13-21(24)29/h15-21,24,28-29H,4-14H2,1-3H3,(H,27,30)(H,31,32)/t15-,16+,17-,18-,19+,20+,21-,24+,25+,26-/m1/s1	C[C@H](CCC(=O)NCC(O)=O)[C@H]1CC[C@H]2[C@@H]3[C@H](O)C[C@@H]4C[C@H](O)CC[C@]4(C)[C@H]3CC[C@]12C	C26H43NO5	C05466		12544.0	46506300.0	36274.0	CHEMBL1552	CHO	12027.0	50375590.0	GHCZAUBVMUEKKP	2	12544.0	Glycochenodeoxycholic Acid	Specialty Uses of Chemicals;Surface-Active Agents;Detergents;Chemical Actions and Uses	GHCZAUBVMUEKKP-GYPHWSFCSA-N
DB04398	Lactic Acid	50-21-5	approved; vet_approved	JVTAAEKCZFNVCJ-UHFFFAOYSA-N	InChI=1S/C3H6O3/c1-2(4)3(5)6/h2,4H,1H3,(H,5,6)	CC(O)C(O)=O	C3H6O3	C01432	D00111	612.0	46505582.0	78320.0	CHEMBL1200559		592.0	23233.0	JVTAAEKCZFNVCJ	123	612.0	Lactic Acid		JVTAAEKCZFNVCJ-UHFFFAOYSA-N
DB03652	beta-D-Galactopyranuronic acid	18968-14-4	experimental	AEMOLEFTQBMNLQ-DTEWXJGMSA-N	InChI=1S/C6H10O7/c7-1-2(8)4(5(10)11)13-6(12)3(1)9/h1-4,6-9,12H,(H,10,11)/t1-,2+,3+,4-,6+/m0/s1	O[C@@H]1O[C@@H]([C@H](O)[C@H](O)[C@H]1O)C(O)=O	C6H10O7	C08348		441476.0	46507499.0	47954.0		GTR	390200.0		AEMOLEFTQBMNLQ	647	445929.0	polygalacturonic acid		AEMOLEFTQBMNLQ-BKBMJHBISA-N
DB01982	D-Mannuronic Acid	1986-14-7	experimental	AEMOLEFTQBMNLQ-BYHBOUFCSA-N	InChI=1S/C6H10O7/c7-1-2(8)4(5(10)11)13-6(12)3(1)9/h1-4,6-9,12H,(H,10,11)/t1-,2-,3-,4-,6-/m0/s1	[H][C@]1(O)O[C@]([H])(C(O)=O)[C@@]([H])(O)[C@]([H])(O)[C@]1([H])O	C6H10O7	C02024		657117.0	46506836.0	16224.0		MAV	571317.0		AEMOLEFTQBMNLQ	647	445929.0	polygalacturonic acid		AEMOLEFTQBMNLQ-BKBMJHBISA-N
DB01980	Para-Iodo-D-Phenylalanine Hydroxamic Acid		experimental	AJEPKWPHKPETBM-MRVPVSSYSA-N	InChI=1S/C9H11IN2O2/c10-7-3-1-6(2-4-7)5-8(11)9(13)12-14/h1-4,8,14H,5,11H2,(H,12,13)/t8-/m1/s1	[H][C@@](N)(CC1=CC=C(I)C=C1)C(=O)NO	C9H11IN2O2			5288643.0	46507696.0			IPO	4450764.0		AJEPKWPHKPETBM	113	4636047.0			AJEPKWPHKPETBM-UHFFFAOYSA-N
DB00120	L-Phenylalanine	63-91-2	approved; investigational; nutraceutical	COLNVLDHVKWLRT-QMMMGPOBSA-N	InChI=1S/C9H11NO2/c10-8(9(11)12)6-7-4-2-1-3-5-7/h1-5,8H,6,10H2,(H,11,12)/t8-/m0/s1	N[C@@H](CC1=CC=CC=C1)C(O)=O	C9H11NO2	C00079	D00021	6140.0	46505708.0	17295.0	CHEMBL301523	PHE	5910.0	18073.0	COLNVLDHVKWLRT	1305	994.0	1,2-dilauroylphosphatidic acid		COLNVLDHVKWLRT-UHFFFAOYSA-N
DB02061	Cellobiose	528-50-7	experimental	GUBGYTABKSRVRQ-CUHNMECISA-N	InChI=1S/C12H22O11/c13-1-3-5(15)6(16)9(19)12(22-3)23-10-4(2-14)21-11(20)8(18)7(10)17/h3-20H,1-2H2/t3-,4-,5-,6+,7-,8-,9-,10-,11?,12+/m1/s1	OC[C@H]1O[C@@H](O[C@H]2[C@H](O)[C@@H](O)C(O)O[C@@H]2CO)[C@H](O)[C@@H](O)[C@@H]1O	C12H22O11	C00185		439178.0	46505046.0	17057.0		CBI	388323.0		GUBGYTABKSRVRQ	445	24802025.0	Cellulose		GUBGYTABKSRVRQ-OMNYSSFVSA-N
DB01642	O1-Methyl-Glucose	7000-27-3	experimental	HOVAGTYPODGVJG-XUUWZHRGSA-N	InChI=1S/C7H14O6/c1-12-7-6(11)5(10)4(9)3(2-8)13-7/h3-11H,2H2,1H3/t3-,4-,5+,6-,7-/m1/s1	CO[C@@H]1O[C@H](CO)[C@@H](O)[C@H](O)[C@H]1O	C7H14O6			445238.0	46507087.0	320055.0	CHEMBL132186	MGL	392933.0		HOVAGTYPODGVJG	693	2108.0	methylmannoside		HOVAGTYPODGVJG-UHFFFAOYSA-N
DB03603	Glucaric acid	87-73-0	experimental	DSLZVSRJTYRBFB-LLEIAEIESA-N	InChI=1S/C6H10O8/c7-1(3(9)5(11)12)2(8)4(10)6(13)14/h1-4,7-10H,(H,11,12)(H,13,14)/t1-,2-,3-,4+/m0/s1	O[C@@H]([C@H](O)[C@@H](O)C(O)=O)[C@H](O)C(O)=O	C6H10O8	C00767		33037.0	46506906.0	16002.0		GKR	30577.0		DSLZVSRJTYRBFB	132	607.0	Glucaric Acid		DSLZVSRJTYRBFB-UHFFFAOYSA-N
DB02644	N-Omega-Propyl-L-Arginine		experimental	AOMXURITGZJPKB-ZETCQYMHSA-O	InChI=1S/C9H20N4O2/c1-2-5-12-9(11)13-6-3-4-7(10)8(14)15/h7H,2-6,10H2,1H3,(H,14,15)(H3,11,12,13)/p+1/t7-/m0/s1	CCCNC(=[NH2+])NCCC[C@H](N)C(O)=O	C9H21N4O2			5287494.0	46507586.0			3AR	4449861.0		AOMXURITGZJPKB	175	447180.0	N5-(imino(propylamino)methyl)ornithine		AOMXURITGZJPKB-ZETCQYMHSA-N
DB03945	N,N,N-Trimethyl-2-(phosphonooxy)ethanaminium	3616-04-4	experimental	YHHSONZFOIEMCP-UHFFFAOYSA-O	InChI=1S/C5H14NO4P/c1-6(2,3)4-5-10-11(7,8)9/h4-5H2,1-3H3,(H-,7,8,9)/p+1	C[N+](C)(C)CCOP(O)(O)=O	C5H15NO4P	C00588		1014.0	46508785.0	18132.0	CHEMBL1235161	PC	989.0		YHHSONZFOIEMCP	638	1014.0	Phosphorylcholine		YHHSONZFOIEMCP-UHFFFAOYSA-O
DB00159	Icosapent	10417-94-4	approved; nutraceutical	JAZBEHYOTPTENJ-JLNKQSITSA-N	InChI=1S/C20H30O2/c1-2-3-4-5-6-7-8-9-10-11-12-13-14-15-16-17-18-19-20(21)22/h3-4,6-7,9-10,12-13,15-16H,2,5,8,11,14,17-19H2,1H3,(H,21,22)/b4-3-,7-6-,10-9-,13-12-,16-15-	CC\C=C/C\C=C/C\C=C/C\C=C/C\C=C/CCCC(O)=O	C20H30O2	C06428	D08061	446284.0	46506267.0	28364.0	CHEMBL460026	EPA	393682.0	50242349.0	JAZBEHYOTPTENJ	552	446284.0	Eicosapentaenoic Acid		JAZBEHYOTPTENJ-JLNKQSITSA-N
DB08264	(1R, 2S)-cis 1,2 dihydroxy-1,2-dihydronaphthalene		experimental	QPUHWUSUBHNZCG-VHSXEESVSA-N	InChI=1S/C10H10O2/c11-9-6-5-7-3-1-2-4-8(7)10(9)12/h1-6,9-12H/t9-,10+/m0/s1	[H][C@]1(O)C=CC2=C(C=CC=C2)[C@@]1([H])O	C10H10O2	C04314		440294.0	99444735.0	44343.0		NDH	389268.0		QPUHWUSUBHNZCG	989	362.0	1,2-dihydroxy-1,2-dihydronaphthalene		QPUHWUSUBHNZCG-UHFFFAOYSA-N
DB04242	P-Hydroxybenzoic Acid		experimental	FJKROLUGYXJWQN-UHFFFAOYSA-N	InChI=1S/C7H6O3/c8-6-3-1-5(2-4-6)7(9)10/h1-4,8H,(H,9,10)	OC(=O)C1=CC=C(O)C=C1	C7H6O3	C00156		135.0	46504662.0	30763.0	CHEMBL441343	PHB	132.0	26194.0	FJKROLUGYXJWQN	973	135.0	4-hydroxybenzoic acid		FJKROLUGYXJWQN-UHFFFAOYSA-N
DB02083	N,N-dimethylglycine	1118-68-9	experimental	FFDGPVCHZBVARC-UHFFFAOYSA-N	InChI=1S/C4H9NO2/c1-5(2)3-4(6)7/h3H2,1-2H3,(H,6,7)	CN(C)CC(O)=O	C4H9NO2	C01026		673.0	46507083.0	58251.0		DMG	653.0		FFDGPVCHZBVARC	291	673.0	dimethylglycine		FFDGPVCHZBVARC-UHFFFAOYSA-N
DB01627	Lincomycin	154-21-2	approved; vet_approved	OJMMVQQUTAEWLP-KIDUDLJLSA-N	InChI=1S/C18H34N2O6S/c1-5-6-10-7-11(20(3)8-10)17(25)19-12(9(2)21)16-14(23)13(22)15(24)18(26-16)27-4/h9-16,18,21-24H,5-8H2,1-4H3,(H,19,25)/t9-,10-,11+,12-,13+,14-,15-,16-,18-/m1/s1	[H][C@](C)(O)[C@@]([H])(N=C(O)[C@]1([H])C[C@@]([H])(CCC)CN1C)[C@@]1([H])O[C@]([H])(SC)[C@]([H])(O)[C@@]([H])(O)[C@@]1([H])O	C18H34N2O6S	C06812	D00223	3000540.0	46506668.0	6472.0	CHEMBL1447	3QB	2272112.0	50335522.0	OJMMVQQUTAEWLP	89	3928.0	Lincomycin	Pharmacologic Actions;Protein Synthesis Inhibitors;Anti-Infective Agents;Chemical Actions and Uses;Therapeutic Uses;Enzyme Inhibitors;Molecular Mechanisms of Pharmacological Action;Anti-Bacterial Agents	OJMMVQQUTAEWLP-UHFFFAOYSA-N
DB03142	Alpha-L-Arabinose		experimental	HMFHBZSHGGEWLO-QMKXCQHVSA-N	InChI=1S/C5H10O5/c6-1-2-3(7)4(8)5(9)10-2/h2-9H,1H2/t2-,3-,4+,5+/m0/s1	OC[C@@H]1O[C@@H](O)[C@H](O)[C@H]1O	C5H10O5	C02604		445935.0	46508212.0	28772.0		AHR	393416.0		HMFHBZSHGGEWLO	44	11521105.0			HMFHBZSHGGEWLO-KKQCNMDGSA-N
DB03246	Beta-L-Arabinose	5328-37-0	experimental	HMFHBZSHGGEWLO-KLVWXMOXSA-N	InChI=1S/C5H10O5/c6-1-2-3(7)4(8)5(9)10-2/h2-9H,1H2/t2-,3-,4+,5-/m0/s1	OC[C@@H]1O[C@H](O)[C@H](O)[C@H]1O	C5H10O5	C02479		6857384.0	46506224.0	28272.0		FUB	5256724.0		HMFHBZSHGGEWLO	44	11521105.0			HMFHBZSHGGEWLO-KKQCNMDGSA-N
DB01369	Quinupristin	120138-50-3	approved	WTHRRGMBUAHGNI-LCYNINFDSA-N	InChI=1S/C53H67N9O10S/c1-6-37-50(68)61-23-11-14-38(61)51(69)59(5)40(26-32-16-18-36(19-17-32)58(3)4)52(70)62-28-35(30-73-43-29-60-24-20-33(43)21-25-60)42(64)27-39(62)47(65)57-45(34-12-8-7-9-13-34)53(71)72-31(2)44(48(66)55-37)56-49(67)46-41(63)15-10-22-54-46/h7-10,12-13,15-19,22,31,33,35,37-40,43-45,63H,6,11,14,20-21,23-30H2,1-5H3,(H,55,66)(H,56,67)(H,57,65)/t31-,35+,37-,38+,39+,40+,43-,44+,45+/m1/…	[H][C@@]12CCCN1C(=O)[C@@H](CC)NC(=O)[C@@H](NC(=O)C1=NC=CC=C1O)[C@@H](C)OC(=O)[C@@H](NC(=O)[C@]1([H])CC(=O)[C@]([H])(CS[C@@H]3CN4CCC3CC4)CN1C(=O)[C@H](CC1=CC=C(C=C1)N(C)C)N(C)C2=O)C1=CC=CC=C1	C53H67N9O10S	C08032	D00852	5388937.0	46505148.0		CHEMBL1200649		4470884.0		WTHRRGMBUAHGNI	392	23724509.0	quinupristin	Therapeutic Uses;Chemical Actions and Uses;Anti-Infective Agents;Pharmacologic Actions;Anti-Bacterial Agents	WTHRRGMBUAHGNI-MJWHERSYSA-N
DB04293	7-(2-Amino-2-Phenyl-Acetylamino)-3-Chloro-8-Oxo-1-Aza-Bicyclo[4.2.0]Oct-2-Ene-2-Carboxylic Acid		experimental	JAPHQRWPEGVNBT-IJLUTSLNSA-N	InChI=1S/C16H16ClN3O4/c17-9-6-7-10-12(15(22)20(10)13(9)16(23)24)19-14(21)11(18)8-4-2-1-3-5-8/h1-5,10-12H,6-7,18H2,(H,19,21)(H,23,24)/t10-,11-,12-/m1/s1	N[C@@H](C(=O)N[C@@H]1[C@H]2CCC(Cl)=C(N2C1=O)C(O)=O)C1=CC=CC=C1	C16H16ClN3O4			12897341.0	46507072.0		CHEMBL3545874	LOR	26330257.0		JAPHQRWPEGVNBT	398	3956.0			JAPHQRWPEGVNBT-UHFFFAOYSA-N
DB02123	Glycochenodeoxycholic Acid	640-79-9	experimental	GHCZAUBVMUEKKP-GYPHWSFCSA-N	InChI=1S/C26H43NO5/c1-15(4-7-22(30)27-14-23(31)32)18-5-6-19-24-20(9-11-26(18,19)3)25(2)10-8-17(28)12-16(25)13-21(24)29/h15-21,24,28-29H,4-14H2,1-3H3,(H,27,30)(H,31,32)/t15-,16+,17-,18-,19+,20+,21-,24+,25+,26-/m1/s1	C[C@H](CCC(=O)NCC(O)=O)[C@H]1CC[C@H]2[C@@H]3[C@H](O)C[C@@H]4C[C@H](O)CC[C@]4(C)[C@H]3CC[C@]12C	C26H43NO5	C05466		12544.0	46506300.0	36274.0	CHEMBL1552	CHO	12027.0	50375590.0	GHCZAUBVMUEKKP	366	12544.0	Glycochenodeoxycholic Acid	Specialty Uses of Chemicals;Surface-Active Agents;Detergents;Chemical Actions and Uses	GHCZAUBVMUEKKP-GYPHWSFCSA-N
DB01606	Tazobactam	89786-04-9	approved	LPQZKKCYTLCDGQ-WEDXCCLWSA-N	InChI=1S/C10H12N4O5S/c1-10(5-13-3-2-11-12-13)8(9(16)17)14-6(15)4-7(14)20(10,18)19/h2-3,7-8H,4-5H2,1H3,(H,16,17)/t7-,8+,10+/m1/s1	[H][C@@]12CC(=O)N1[C@@H](C(O)=O)[C@](C)(CN1C=CN=N1)S2(=O)=O	C10H12N4O5S	C07771	D00660	123630.0	46508088.0	9421.0	CHEMBL404		110216.0	50053173.0	LPQZKKCYTLCDGQ	387	4836.0			LPQZKKCYTLCDGQ-UHFFFAOYSA-N
DB00731	Nateglinide	105816-04-4	approved; investigational	OELFLUMRDSZNSF-BRWVUGGUSA-N	InChI=1S/C19H27NO3/c1-13(2)15-8-10-16(11-9-15)18(21)20-17(19(22)23)12-14-6-4-3-5-7-14/h3-7,13,15-17H,8-12H2,1-2H3,(H,20,21)(H,22,23)/t15-,16-,17-/m1/s1	[H][C@](CC1=CC=CC=C1)(N=C(O)[C@@]1([H])CC[C@@]([H])(CC1)C(C)C)C(O)=O	C19H27NO3	C12508	D01111	5311309.0	46504836.0	31897.0	CHEMBL783		10482084.0	50344967.0	OELFLUMRDSZNSF	273	4443.0			OELFLUMRDSZNSF-UHFFFAOYSA-N
DB03608	Diminazene	536-71-0	experimental	XNYZHCFCZNMTFY-UHFFFAOYSA-N	InChI=1S/C14H15N7/c15-13(16)9-1-5-11(6-2-9)19-21-20-12-7-3-10(4-8-12)14(17)18/h1-8H,(H3,15,16)(H3,17,18)(H,19,20)	NC(=N)C1=CC=C(N\N=N\C2=CC=C(C=C2)C(N)=N)C=C1	C14H15N7	C18388		2354.0	46504758.0	81724.0	CHEMBL35241	BRN	2264.0	50000999.0	XNYZHCFCZNMTFY	756	2354.0	Diminazene	Antiprotozoal Agents;Pharmacologic Actions;Anti-Infective Agents;Chemical Actions and Uses;Trypanocidal Agents;Antiparasitic Agents;Therapeutic Uses	XNYZHCFCZNMTFY-UHFFFAOYSA-N
DB05327	Ranirestat	147254-64-6	investigational	QCVNMNYRNIMDKV-QGZVFWFLSA-N	InChI=1S/C17H11BrFN3O4/c18-10-4-3-9(11(19)6-10)8-21-14(24)12-2-1-5-22(12)17(16(21)26)7-13(23)20-15(17)25/h1-6H,7-8H2,(H,20,23,25)/t17-/m1/s1	FC1=C(CN2C(=O)C3=CC=CN3[C@@]3(CC(=O)NC3=O)C2=O)C=CC(Br)=C1	C17H11BrFN3O4			153948.0	175426978.0		CHEMBL334830		135685.0	50067407.0	QCVNMNYRNIMDKV	379	9953887.0			QCVNMNYRNIMDKV-UHFFFAOYSA-N
DB03640	Beta-Hydroxyaspartic Acid		experimental	YYLQUHNPNCGKJQ-NHYDCYSISA-N	InChI=1S/C4H7NO5/c5-1(3(7)8)2(6)4(9)10/h1-2,6H,5H2,(H,7,8)(H,9,10)/t1-,2+/m0/s1	N[C@@H]([C@@H](O)C(O)=O)C(O)=O	C4H7NO5	C03961		14463.0	46508333.0	17576.0	CHEMBL3317781	BH2	13809.0		YYLQUHNPNCGKJQ	738	5425.0	3-hydroxyaspartic acid		YYLQUHNPNCGKJQ-UHFFFAOYSA-N
DB01190	Clindamycin	18323-44-9	approved; vet_approved	KDLRVYVGXIQJDK-NOWPCOIGSA-N	InChI=1S/C18H33ClN2O5S/c1-5-6-10-7-11(21(3)8-10)17(25)20-12(9(2)19)16-14(23)13(22)15(24)18(26-16)27-4/h9-16,18,22-24H,5-8H2,1-4H3,(H,20,25)/t9?,10-,11+,12?,13+,14-,15-,16-,18-/m1/s1	CCC[C@@H]1C[C@H](N(C)C1)C(=O)NC(C(C)Cl)[C@H]1O[C@H](SC)[C@H](O)[C@@H](O)[C@H]1O	C18H33ClN2O5S	C06914	D00277	446598.0	46506073.0	3745.0	CHEMBL376185	CLY	27005.0		KDLRVYVGXIQJDK	415	29029.0	Clindamycin	Enzyme Inhibitors;Anti-Infective Agents;Pharmacologic Actions;Molecular Mechanisms of Pharmacological Action;Anti-Bacterial Agents;Chemical Actions and Uses;Protein Synthesis Inhibitors;Therapeutic Uses	KDLRVYVGXIQJDK-NOWPCOIGSA-N
DB01627	Lincomycin	154-21-2	approved; vet_approved	OJMMVQQUTAEWLP-KIDUDLJLSA-N	InChI=1S/C18H34N2O6S/c1-5-6-10-7-11(20(3)8-10)17(25)19-12(9(2)21)16-14(23)13(22)15(24)18(26-16)27-4/h9-16,18,21-24H,5-8H2,1-4H3,(H,19,25)/t9-,10-,11+,12-,13+,14-,15-,16-,18-/m1/s1	[H][C@](C)(O)[C@@]([H])(N=C(O)[C@]1([H])C[C@@]([H])(CCC)CN1C)[C@@]1([H])O[C@]([H])(SC)[C@]([H])(O)[C@@]([H])(O)[C@@]1([H])O	C18H34N2O6S	C06812	D00223	3000540.0	46506668.0	6472.0	CHEMBL1447	3QB	2272112.0	50335522.0	OJMMVQQUTAEWLP	197	3928.0	Lincomycin	Pharmacologic Actions;Protein Synthesis Inhibitors;Anti-Infective Agents;Chemical Actions and Uses;Therapeutic Uses;Enzyme Inhibitors;Molecular Mechanisms of Pharmacological Action;Anti-Bacterial Agents	OJMMVQQUTAEWLP-UHFFFAOYSA-N
DB03142	Alpha-L-Arabinose		experimental	HMFHBZSHGGEWLO-QMKXCQHVSA-N	InChI=1S/C5H10O5/c6-1-2-3(7)4(8)5(9)10-2/h2-9H,1H2/t2-,3-,4+,5+/m0/s1	OC[C@@H]1O[C@@H](O)[C@H](O)[C@H]1O	C5H10O5	C02604		445935.0	46508212.0	28772.0		AHR	393416.0		HMFHBZSHGGEWLO	0	11521105.0			HMFHBZSHGGEWLO-KKQCNMDGSA-N
DB03246	Beta-L-Arabinose	5328-37-0	experimental	HMFHBZSHGGEWLO-KLVWXMOXSA-N	InChI=1S/C5H10O5/c6-1-2-3(7)4(8)5(9)10-2/h2-9H,1H2/t2-,3-,4+,5-/m0/s1	OC[C@@H]1O[C@H](O)[C@H](O)[C@H]1O	C5H10O5	C02479		6857384.0	46506224.0	28272.0		FUB	5256724.0		HMFHBZSHGGEWLO	0	11521105.0			HMFHBZSHGGEWLO-KKQCNMDGSA-N
DB01369	Quinupristin	120138-50-3	approved	WTHRRGMBUAHGNI-LCYNINFDSA-N	InChI=1S/C53H67N9O10S/c1-6-37-50(68)61-23-11-14-38(61)51(69)59(5)40(26-32-16-18-36(19-17-32)58(3)4)52(70)62-28-35(30-73-43-29-60-24-20-33(43)21-25-60)42(64)27-39(62)47(65)57-45(34-12-8-7-9-13-34)53(71)72-31(2)44(48(66)55-37)56-49(67)46-41(63)15-10-22-54-46/h7-10,12-13,15-19,22,31,33,35,37-40,43-45,63H,6,11,14,20-21,23-30H2,1-5H3,(H,55,66)(H,56,67)(H,57,65)/t31-,35+,37-,38+,39+,40+,43-,44+,45+/m1/…	[H][C@@]12CCCN1C(=O)[C@@H](CC)NC(=O)[C@@H](NC(=O)C1=NC=CC=C1O)[C@@H](C)OC(=O)[C@@H](NC(=O)[C@]1([H])CC(=O)[C@]([H])(CS[C@@H]3CN4CCC3CC4)CN1C(=O)[C@H](CC1=CC=C(C=C1)N(C)C)N(C)C2=O)C1=CC=CC=C1	C53H67N9O10S	C08032	D00852	5388937.0	46505148.0		CHEMBL1200649		4470884.0		WTHRRGMBUAHGNI	341	71338.0	quinupristin	Anti-Infective Agents;Chemical Actions and Uses;Therapeutic Uses;Anti-Bacterial Agents;Pharmacologic Actions	WTHRRGMBUAHGNI-UHFFFAOYSA-N
DB09220	Nicorandil	65141-46-0	approved; investigational	LBHIOVVIQHSOQN-UHFFFAOYSA-N	InChI=1S/C8H9N3O4/c12-8(7-2-1-3-9-6-7)10-4-5-15-11(13)14/h1-3,6H,4-5H2,(H,10,12)	[O-][N+](=O)OCCNC(=O)C1=CC=CN=C1	C8H9N3O4	C13280	D01810	47528.0	310265127.0	31905.0	CHEMBL284906		43240.0		LBHIOVVIQHSOQN	272	47528.0	Nicorandil	Chemical Actions and Uses;Vitamins;Antihypertensive Agents;Therapeutic Uses;Micronutrients;Growth Substances;Nutrients;Anti-Arrhythmia Agents;Pharmacologic Actions;Vasodilator Agents;Vitamin B Complex;Physiological Effects of Drugs;Cardiovascular Agents	LBHIOVVIQHSOQN-UHFFFAOYSA-N
DB04293	7-(2-Amino-2-Phenyl-Acetylamino)-3-Chloro-8-Oxo-1-Aza-Bicyclo[4.2.0]Oct-2-Ene-2-Carboxylic Acid		experimental	JAPHQRWPEGVNBT-IJLUTSLNSA-N	InChI=1S/C16H16ClN3O4/c17-9-6-7-10-12(15(22)20(10)13(9)16(23)24)19-14(21)11(18)8-4-2-1-3-5-8/h1-5,10-12H,6-7,18H2,(H,19,21)(H,23,24)/t10-,11-,12-/m1/s1	N[C@@H](C(=O)N[C@@H]1[C@H]2CCC(Cl)=C(N2C1=O)C(O)=O)C1=CC=CC=C1	C16H16ClN3O4			12897341.0	46507072.0		CHEMBL3545874	LOR	26330257.0		JAPHQRWPEGVNBT	504	3956.0			JAPHQRWPEGVNBT-UHFFFAOYSA-N
DB01606	Tazobactam	89786-04-9	approved	LPQZKKCYTLCDGQ-WEDXCCLWSA-N	InChI=1S/C10H12N4O5S/c1-10(5-13-3-2-11-12-13)8(9(16)17)14-6(15)4-7(14)20(10,18)19/h2-3,7-8H,4-5H2,1H3,(H,16,17)/t7-,8+,10+/m1/s1	[H][C@@]12CC(=O)N1[C@@H](C(O)=O)[C@](C)(CN1C=CN=N1)S2(=O)=O	C10H12N4O5S	C07771	D00660	123630.0	46508088.0	9421.0	CHEMBL404		110216.0	50053173.0	LPQZKKCYTLCDGQ	184	4836.0			LPQZKKCYTLCDGQ-UHFFFAOYSA-N
DB00731	Nateglinide	105816-04-4	approved; investigational	OELFLUMRDSZNSF-BRWVUGGUSA-N	InChI=1S/C19H27NO3/c1-13(2)15-8-10-16(11-9-15)18(21)20-17(19(22)23)12-14-6-4-3-5-7-14/h3-7,13,15-17H,8-12H2,1-2H3,(H,20,21)(H,22,23)/t15-,16-,17-/m1/s1	[H][C@](CC1=CC=CC=C1)(N=C(O)[C@@]1([H])CC[C@@]([H])(CC1)C(C)C)C(O)=O	C19H27NO3	C12508	D01111	5311309.0	46504836.0	31897.0	CHEMBL783		10482084.0	50344967.0	OELFLUMRDSZNSF	550	4443.0			OELFLUMRDSZNSF-UHFFFAOYSA-N
DB03608	Diminazene	536-71-0	experimental	XNYZHCFCZNMTFY-UHFFFAOYSA-N	InChI=1S/C14H15N7/c15-13(16)9-1-5-11(6-2-9)19-21-20-12-7-3-10(4-8-12)14(17)18/h1-8H,(H3,15,16)(H3,17,18)(H,19,20)	NC(=N)C1=CC=C(N\N=N\C2=CC=C(C=C2)C(N)=N)C=C1	C14H15N7	C18388		2354.0	46504758.0	81724.0	CHEMBL35241	BRN	2264.0	50000999.0	XNYZHCFCZNMTFY	221	2354.0	Diminazene	Antiprotozoal Agents;Pharmacologic Actions;Anti-Infective Agents;Chemical Actions and Uses;Trypanocidal Agents;Antiparasitic Agents;Therapeutic Uses	XNYZHCFCZNMTFY-UHFFFAOYSA-N
DB05327	Ranirestat	147254-64-6	investigational	QCVNMNYRNIMDKV-QGZVFWFLSA-N	InChI=1S/C17H11BrFN3O4/c18-10-4-3-9(11(19)6-10)8-21-14(24)12-2-1-5-22(12)17(16(21)26)7-13(23)20-15(17)25/h1-6H,7-8H2,(H,20,23,25)/t17-/m1/s1	FC1=C(CN2C(=O)C3=CC=CN3[C@@]3(CC(=O)NC3=O)C2=O)C=CC(Br)=C1	C17H11BrFN3O4			153948.0	175426978.0		CHEMBL334830		135685.0	50067407.0	QCVNMNYRNIMDKV	261	153948.0	ranirestat	Chemical Actions and Uses;Enzyme Inhibitors;Molecular Mechanisms of Pharmacological Action;Pharmacologic Actions	QCVNMNYRNIMDKV-QGZVFWFLSA-N
DB03640	Beta-Hydroxyaspartic Acid		experimental	YYLQUHNPNCGKJQ-NHYDCYSISA-N	InChI=1S/C4H7NO5/c5-1(3(7)8)2(6)4(9)10/h1-2,6H,5H2,(H,7,8)(H,9,10)/t1-,2+/m0/s1	N[C@@H]([C@@H](O)C(O)=O)C(O)=O	C4H7NO5	C03961		14463.0	46508333.0	17576.0	CHEMBL3317781	BH2	13809.0		YYLQUHNPNCGKJQ	384	5425.0	3-hydroxyaspartic acid		YYLQUHNPNCGKJQ-UHFFFAOYSA-N
DB01190	Clindamycin	18323-44-9	approved; vet_approved	KDLRVYVGXIQJDK-NOWPCOIGSA-N	InChI=1S/C18H33ClN2O5S/c1-5-6-10-7-11(21(3)8-10)17(25)20-12(9(2)19)16-14(23)13(22)15(24)18(26-16)27-4/h9-16,18,22-24H,5-8H2,1-4H3,(H,20,25)/t9?,10-,11+,12?,13+,14-,15-,16-,18-/m1/s1	CCC[C@@H]1C[C@H](N(C)C1)C(=O)NC(C(C)Cl)[C@H]1O[C@H](SC)[C@H](O)[C@@H](O)[C@H]1O	C18H33ClN2O5S	C06914	D00277	446598.0	46506073.0	3745.0	CHEMBL376185	CLY	27005.0		KDLRVYVGXIQJDK	78	29029.0	Clindamycin	Enzyme Inhibitors;Anti-Infective Agents;Pharmacologic Actions;Molecular Mechanisms of Pharmacological Action;Anti-Bacterial Agents;Chemical Actions and Uses;Protein Synthesis Inhibitors;Therapeutic Uses	KDLRVYVGXIQJDK-NOWPCOIGSA-N
DB02175	Malonic acid	141-82-2	experimental	OFOBLEOULBTSOW-UHFFFAOYSA-N	InChI=1S/C3H4O4/c4-2(5)1-3(6)7/h1H2,(H,4,5)(H,6,7)	OC(=O)CC(O)=O	C3H4O4	C04025		867.0	46504875.0	30794.0	CHEMBL7942	MLA	844.0	14673.0	OFOBLEOULBTSOW	1124	867.0	malonic acid		OFOBLEOULBTSOW-UHFFFAOYSA-N
DB01252	Mitiglinide	145375-43-5	investigational	WPGGHFDDFPHPOB-BBWFWOEESA-N	InChI=1S/C19H25NO3/c21-18(20-12-15-8-4-5-9-16(15)13-20)11-17(19(22)23)10-14-6-2-1-3-7-14/h1-3,6-7,15-17H,4-5,8-13H2,(H,22,23)/t15-,16+,17-/m0/s1	[H][C@@](CC(=O)N1C[C@@]2([H])CCCC[C@@]2([H])C1)(CC1=CC=CC=C1)C(O)=O	C19H25NO3		D01854	121891.0	46506527.0	135349.0	CHEMBL471498		108739.0		WPGGHFDDFPHPOB	3443	121891.0	mitiglinide	Physiological Effects of Drugs;Hypoglycemic Agents;Pharmacologic Actions;Chemical Actions and Uses	WPGGHFDDFPHPOB-BBWFWOEESA-N
DB01251	Gliquidone	33342-05-1	approved; investigational	LLJFMFZYVVLQKT-UHFFFAOYSA-N	InChI=1S/C27H33N3O6S/c1-27(2)23-14-11-20(36-3)17-22(23)24(31)30(25(27)32)16-15-18-9-12-21(13-10-18)37(34,35)29-26(33)28-19-7-5-4-6-8-19/h9-14,17,19H,4-8,15-16H2,1-3H3,(H2,28,29,33)	COC1=CC2=C(C=C1)C(C)(C)C(=O)N(CCC1=CC=C(C=C1)S(=O)(=O)NC(=O)NC1CCCCC1)C2=O	C27H33N3O6S		D02430	91610.0	46508425.0	93416.0	CHEMBL383634		82719.0		LLJFMFZYVVLQKT	156	91610.0	gliquidone	Pharmacologic Actions;Chemical Actions and Uses;Physiological Effects of Drugs;Hypoglycemic Agents	LLJFMFZYVVLQKT-UHFFFAOYSA-N
DB08168	7-AMINO-4-METHYL-CHROMEN-2-ONE		experimental	GLNDAGDHSLMOKX-UHFFFAOYSA-N	InChI=1S/C10H9NO2/c1-6-4-10(12)13-9-5-7(11)2-3-8(6)9/h2-5H,11H2,1H3	CC1=CC(=O)OC2=C1C=CC(N)=C2	C10H9NO2	C01386		92249.0	99444639.0	51771.0	CHEMBL270672	MCM	83285.0	71742.0	GLNDAGDHSLMOKX	2601	92249.0	7-amino-4-methylcoumarin	Chemical Actions and Uses;Laboratory Chemicals;Specialty Uses of Chemicals;Indicators and Reagents	GLNDAGDHSLMOKX-UHFFFAOYSA-N
DB01896	M-Aminophenylboronic Acid		experimental	JMZFEHDNIAQMNB-UHFFFAOYSA-N	InChI=1S/C6H8BNO2/c8-6-3-1-2-5(4-6)7(9)10/h1-4,9-10H,8H2	NC1=CC=CC(=C1)B(O)O	C6H8BNO2			92269.0	46506000.0		CHEMBL20852	APB	83303.0	50067906.0	JMZFEHDNIAQMNB	3665	92269.0	3-aminobenzeneboronic acid		JMZFEHDNIAQMNB-UHFFFAOYSA-N
DB02553	Glutathionylspermidine Disulfide		experimental	HCMZDPYSWPSKSP-XPGKHFPBSA-N	InChI=1S/C34H66N12O10S2/c35-11-1-3-13-39-15-5-17-41-29(49)19-43-31(51)25(45-27(47)9-7-23(37)33(53)54)21-57-58-22-26(46-28(48)10-8-24(38)34(55)56)32(52)44-20-30(50)42-18-6-16-40-14-4-2-12-36/h23-26,39-40H,1-22,35-38H2,(H,41,49)(H,42,50)(H,43,51)(H,44,52)(H,45,47)(H,46,48)(H,53,54)(H,55,56)/t23-,24-,25+,26+/m1/s1	[H][C@@](N)(CCC(O)=N[C@@]([H])(CSSC[C@]([H])(N=C(O)CC[C@@]([H])(N)C(O)=O)C(O)=NCC(O)=NCCCNCCCCN)C(O)=NCC(O)=NCCCNCCCCN)C(O)=O	C34H66N12O10S2			449555.0	46505065.0			TS4	396047.0		HCMZDPYSWPSKSP	2365	449555.0			HCMZDPYSWPSKSP-XPGKHFPBSA-N
DB03707	S-Ethyl-N-Phenyl-Isothiourea		experimental	LAXNJIWNBHHMDO-UHFFFAOYSA-N	InChI=1S/C9H12N2S/c1-2-12-9(10)11-8-6-4-3-5-7-8/h3-7H,2H2,1H3,(H2,10,11)	CCS\C(N)=N\C1=CC=CC=C1	C9H12N2S			347590.0	46506739.0		CHEMBL451666	PTU	308438.0	50058459.0	LAXNJIWNBHHMDO	1643	347590.0			LAXNJIWNBHHMDO-UHFFFAOYSA-N
DB03953	L-Thiocitrulline		experimental	BKGWACHYAMTLAF-BYPYZUCNSA-N	InChI=1S/C6H13N3O2S/c7-4(5(10)11)2-1-3-9-6(8)12/h4H,1-3,7H2,(H,10,11)(H3,8,9,12)/t4-/m0/s1	N[C@@H](CCC\N=C(/N)S)C(O)=O	C6H13N3O2S			2733514.0	46505566.0		CHEMBL93247	SCI	2015302.0	50095201.0	BKGWACHYAMTLAF	2951	2733514.0			BKGWACHYAMTLAF-BYPYZUCNSA-N
DB03310	Glutathione disulfide	27025-41-8	approved; experimental; investigational	YPZRWBKMTBYPTK-BJDJZHNGSA-N	InChI=1S/C20H32N6O12S2/c21-9(19(35)36)1-3-13(27)25-11(17(33)23-5-15(29)30)7-39-40-8-12(18(34)24-6-16(31)32)26-14(28)4-2-10(22)20(37)38/h9-12H,1-8,21-22H2,(H,23,33)(H,24,34)(H,25,27)(H,26,28)(H,29,30)(H,31,32)(H,35,36)(H,37,38)/t9-,10-,11-,12-/m0/s1	N[C@@H](CCC(=O)N[C@@H](CSSC[C@H](NC(=O)CC[C@H](N)C(O)=O)C(=O)NCC(O)=O)C(=O)NCC(O)=O)C(O)=O	C20H32N6O12S2	C00127	D00031	65359.0	46508372.0	17858.0	CHEMBL1372	GDS	58835.0	225231.0	YPZRWBKMTBYPTK	3716	975.0			YPZRWBKMTBYPTK-UHFFFAOYSA-N
DB04509	N-Methylnaloxonium		experimental	PCSQOABIHJXZMR-YNUHATHGSA-O	InChI=1S/C20H23NO4/c1-3-9-21(2)10-8-19-16-12-4-5-13(22)17(16)25-18(19)14(23)6-7-20(19,24)15(21)11-12/h3-5,15,18,24H,1,6-11H2,2H3/p+1/t15-,18+,19+,20-,21-/m1/s1	C[N@@+]1(CC=C)CC[C@]23[C@H]4OC5=C(O)C=CC(C[C@@H]1[C@]2(O)CCC4=O)=C35	C20H24NO4			6323452.0	46508658.0			NLX	4883425.0		PCSQOABIHJXZMR	326	6323452.0			PCSQOABIHJXZMR-YNUHATHGSA-O
DB03929	D-Serine	312-84-5	approved; experimental	MTCFGRXMJLQNBG-UWTATZPHSA-N	InChI=1S/C3H7NO3/c4-2(1-5)3(6)7/h2,5H,1,4H2,(H,6,7)/t2-/m1/s1	N[C@H](CO)C(O)=O	C3H7NO3	C00740		71077.0	46508200.0	16523.0	CHEMBL285123	DSN	64231.0	23167.0	MTCFGRXMJLQNBG	923	617.0			MTCFGRXMJLQNBG-UHFFFAOYSA-N
DB02132	Zenarestat	112733-06-9	experimental	SXONDGSPUVNZLO-UHFFFAOYSA-N	InChI=1S/C17H11BrClFN2O4/c18-10-2-1-9(13(20)5-10)7-22-16(25)12-4-3-11(19)6-14(12)21(17(22)26)8-15(23)24/h1-6H,7-8H2,(H,23,24)	OC(=O)CN1C(=O)N(CC2=C(F)C=C(Br)C=C2)C(=O)C2=C1C=C(Cl)C=C2	C17H11BrClFN2O4			5724.0	46507491.0		CHEMBL10413	ZES	5522.0	16496.0	SXONDGSPUVNZLO	2190	5724.0	FR 74366	Molecular Mechanisms of Pharmacological Action;Pharmacologic Actions;Chemical Actions and Uses;Enzyme Inhibitors	SXONDGSPUVNZLO-UHFFFAOYSA-N
DB01211	Clarithromycin	81103-11-9	approved	AGOYDEPGAOXOCK-KCBOHYOISA-N	InChI=1S/C38H69NO13/c1-15-26-38(10,45)31(42)21(4)28(40)19(2)17-37(9,47-14)33(52-35-29(41)25(39(11)12)16-20(3)48-35)22(5)30(23(6)34(44)50-26)51-27-18-36(8,46-13)32(43)24(7)49-27/h19-27,29-33,35,41-43,45H,15-18H2,1-14H3/t19-,20-,21+,22+,23-,24+,25+,26-,27+,29-,30+,31-,32+,33-,35+,36-,37-,38-/m1/s1	[H][C@@]1(C[C@@](C)(OC)[C@@H](O)[C@H](C)O1)O[C@H]1[C@H](C)[C@@H](O[C@]2([H])O[C@H](C)C[C@@H]([C@H]2O)N(C)C)[C@@](C)(C[C@@H](C)C(=O)[C@H](C)[C@@H](O)[C@](C)(O)[C@@H](CC)OC(=O)[C@@H]1C)OC	C38H69NO13	C06912	D00276	84029.0	46506489.0	3732.0	CHEMBL1741	CTY	10342604.0	50404044.0	AGOYDEPGAOXOCK	634	54688.0			AGOYDEPGAOXOCK-AVDMLEEESA-N
DB08231	Myristic acid	544-63-8	experimental	TUNFSRHWOTWDNC-UHFFFAOYSA-N	InChI=1S/C14H28O2/c1-2-3-4-5-6-7-8-9-10-11-12-13-14(15)16/h2-13H2,1H3,(H,15,16)	CCCCCCCCCCCCCC(O)=O	C14H28O2	C06424		11005.0	99444702.0	28875.0	CHEMBL111077	MYR	10539.0	50147581.0	TUNFSRHWOTWDNC	3139	11005.0	Myristic Acid		TUNFSRHWOTWDNC-UHFFFAOYSA-N
DB03100	6-Nitroindazole		experimental	ORZRMRUXSPNQQL-UHFFFAOYSA-N	InChI=1S/C7H5N3O2/c11-10(12)6-2-1-5-4-8-9-7(5)3-6/h1-4H,(H,8,9)	O=N(=O)C1=CC2=NNC=C2C=C1	C7H5N3O2			24239.0	46504479.0		CHEMBL54277	6NI	22661.0	50284964.0	ORZRMRUXSPNQQL	63	24239.0	6-nitroindazole		ORZRMRUXSPNQQL-UHFFFAOYSA-N
DB02044	N-(3-(Aminomethyl)Benzyl)Acetamidine		experimental	RODUKNYOEVZQPR-UHFFFAOYSA-N	InChI=1S/C10H15N3/c1-8(12)13-7-10-4-2-3-9(5-10)6-11/h2-5H,6-7,11H2,1H3,(H2,12,13)	CC(=N)NCC1=CC=CC(CN)=C1	C10H15N3			1433.0	46507793.0	90721.0	CHEMBL107251	14W	1389.0	50065805.0	RODUKNYOEVZQPR	3133	1433.0	N-(3-(aminomethyl)benzyl)acetamidine	Enzyme Inhibitors;Chemical Actions and Uses;Molecular Mechanisms of Pharmacological Action;Pharmacologic Actions	RODUKNYOEVZQPR-UHFFFAOYSA-N
DB02911	2,4-Diamino-6-Phenyl-5,6,7,8,-Tetrahydropteridine		experimental	VEKRIXRQADJFAG-QMMMGPOBSA-N	InChI=1S/C12H14N6/c13-10-9-11(18-12(14)17-10)15-6-8(16-9)7-4-2-1-3-5-7/h1-5,8,16H,6H2,(H5,13,14,15,17,18)/t8-/m0/s1	[H][C@]1(CNC2=C(N1)C(N)=NC(N)=N2)C1=CC=CC=C1	C12H14N6			445109.0	46504888.0			AP6	392845.0		VEKRIXRQADJFAG	2555	445109.0			VEKRIXRQADJFAG-QMMMGPOBSA-N
DB04483	2-deoxy-2-fluoro-β-D-mannose	55449-80-4	experimental	ZCXUVYAZINUVJD-AIECOIEWSA-N	InChI=1S/C6H11FO5/c7-3-5(10)4(9)2(1-8)12-6(3)11/h2-6,8-11H,1H2/t2-,3+,4-,5-,6-/m1/s1	OC[C@H]1O[C@@H](O)[C@@H](F)[C@@H](O)[C@@H]1O	C6H11FO5			445913.0	46507903.0	49152.0	CHEMBL1234222	MAF	393404.0		ZCXUVYAZINUVJD	2688	5288324.0			ZCXUVYAZINUVJD-QZABAPFNSA-N
DB04084	2-deoxy-2-fluoro-α-D-mannose	62182-14-3	experimental	ZCXUVYAZINUVJD-RXRWUWDJSA-N	InChI=1S/C6H11FO5/c7-3-5(10)4(9)2(1-8)12-6(3)11/h2-6,8-11H,1H2/t2-,3+,4-,5-,6+/m1/s1	OC[C@H]1O[C@H](O)[C@@H](F)[C@@H](O)[C@@H]1O	C6H11FO5			2758978.0	46506090.0	49148.0		MBF	2039733.0		ZCXUVYAZINUVJD	2688	5288324.0			ZCXUVYAZINUVJD-QZABAPFNSA-N
DB01627	Lincomycin	154-21-2	approved; vet_approved	OJMMVQQUTAEWLP-KIDUDLJLSA-N	InChI=1S/C18H34N2O6S/c1-5-6-10-7-11(20(3)8-10)17(25)19-12(9(2)21)16-14(23)13(22)15(24)18(26-16)27-4/h9-16,18,21-24H,5-8H2,1-4H3,(H,19,25)/t9-,10-,11+,12-,13+,14-,15-,16-,18-/m1/s1	[H][C@](C)(O)[C@@]([H])(N=C(O)[C@]1([H])C[C@@]([H])(CCC)CN1C)[C@@]1([H])O[C@]([H])(SC)[C@]([H])(O)[C@@]([H])(O)[C@@]1([H])O	C18H34N2O6S	C06812	D00223	3000540.0	46506668.0	6472.0	CHEMBL1447	3QB	2272112.0	50335522.0	OJMMVQQUTAEWLP	1556	3928.0	Lincomycin	Pharmacologic Actions;Protein Synthesis Inhibitors;Anti-Infective Agents;Chemical Actions and Uses;Therapeutic Uses;Enzyme Inhibitors;Molecular Mechanisms of Pharmacological Action;Anti-Bacterial Agents	OJMMVQQUTAEWLP-UHFFFAOYSA-N
DB08653	2-(1H-INDOL-3-YL)ETHANAMINE		experimental	APJYDQYYACXCRM-UHFFFAOYSA-N	InChI=1S/C10H12N2/c11-6-5-8-7-12-10-4-2-1-3-9(8)10/h1-4,7,12H,5-6,11H2	NCCC1=CNC2=CC=CC=C12	C10H12N2	C00398		1150.0	99445124.0	16765.0	CHEMBL6640	TSS	1118.0	50024210.0	APJYDQYYACXCRM	1799	1150.0	tryptamine		APJYDQYYACXCRM-UHFFFAOYSA-N
DB00140	Riboflavin	83-88-5	approved; investigational; nutraceutical; vet_approved	AUNGANRZJHBGPY-SCRDCRAPSA-N	InChI=1S/C17H20N4O6/c1-7-3-9-10(4-8(7)2)21(5-11(23)14(25)12(24)6-22)15-13(18-9)16(26)20-17(27)19-15/h3-4,11-12,14,22-25H,5-6H2,1-2H3,(H,20,26,27)/t11-,12+,14-/m0/s1	CC1=C(C)C=C2N(C[C@H](O)[C@H](O)[C@H](O)CO)C3=NC(=O)NC(=O)C3=NC2=C1	C17H20N4O6	C00255	D00050	493570.0	46507342.0	17015.0	CHEMBL1534	RBF	431981.0	50362895.0	AUNGANRZJHBGPY	2027	6759.0			AUNGANRZJHBGPY-MBNYWOFBSA-N
DB02462	Thiocoumarin		experimental	DIOZFKOOIBATNZ-UHFFFAOYSA-N	InChI=1S/C14H17NO2S/c1-15(2)8-5-9-17-12-10-14(16)18-13-7-4-3-6-11(12)13/h3-4,6-7,10H,5,8-9H2,1-2H3	CN(C)CCCOC1=CC(=O)SC2=CC=CC=C12	C14H17NO2S			657073.0	46508183.0			FC1	571284.0		DIOZFKOOIBATNZ	2679	657073.0			DIOZFKOOIBATNZ-UHFFFAOYSA-N
DB02469	4,6-dideoxy-4-amino-beta-D-glucopyranoside		experimental	RJKBJEZZABBYBA-VFUOTHLCSA-N	InChI=1S/C6H13NO4/c1-2-3(7)4(8)5(9)6(10)11-2/h2-6,8-10H,7H2,1H3/t2-,3-,4+,5-,6-/m1/s1	[H][C@]1(C)O[C@@]([H])(O)[C@]([H])(O)[C@@]([H])(O)[C@]1([H])N	C6H13NO4			447845.0	46507559.0			DAG	394823.0		RJKBJEZZABBYBA	1864	444139.0			RJKBJEZZABBYBA-DVKNGEFBSA-N
DB03144	N-Omega-Hydroxy-L-Arginine		experimental	FQWRAVYMZULPNK-BYPYZUCNSA-N	InChI=1S/C6H14N4O3/c7-4(5(11)12)2-1-3-9-6(8)10-13/h4,13H,1-3,7H2,(H,11,12)(H3,8,9,10)/t4-/m0/s1	N[C@@H](CCCNC(=N)NO)C(O)=O	C6H14N4O3			123895.0	46506099.0	43088.0	CHEMBL260629	HAR	110427.0	50230418.0	FQWRAVYMZULPNK	2579	123895.0	N(omega)-hydroxyarginine		FQWRAVYMZULPNK-BYPYZUCNSA-N
DB03142	Alpha-L-Arabinose		experimental	HMFHBZSHGGEWLO-QMKXCQHVSA-N	InChI=1S/C5H10O5/c6-1-2-3(7)4(8)5(9)10-2/h2-9H,1H2/t2-,3-,4+,5+/m0/s1	OC[C@@H]1O[C@@H](O)[C@H](O)[C@H]1O	C5H10O5	C02604		445935.0	46508212.0	28772.0		AHR	393416.0		HMFHBZSHGGEWLO	2219	11521105.0			HMFHBZSHGGEWLO-KKQCNMDGSA-N
DB03246	Beta-L-Arabinose	5328-37-0	experimental	HMFHBZSHGGEWLO-KLVWXMOXSA-N	InChI=1S/C5H10O5/c6-1-2-3(7)4(8)5(9)10-2/h2-9H,1H2/t2-,3-,4+,5-/m0/s1	OC[C@@H]1O[C@H](O)[C@H](O)[C@H]1O	C5H10O5	C02479		6857384.0	46506224.0	28272.0		FUB	5256724.0		HMFHBZSHGGEWLO	2219	11521105.0			HMFHBZSHGGEWLO-KKQCNMDGSA-N
DB03065	7-Nitroindazole-2-Carboxamidine		experimental	GFYAZUABYOOPCN-UHFFFAOYSA-N	InChI=1S/C8H7N5O2/c9-8(10)12-4-5-2-1-3-6(13(14)15)7(5)11-12/h1-4H,(H3,9,10)	NC(=N)N1C=C2C=CC=C(C2=N1)[N+]([O-])=O	C8H7N5O2			1894.0	46506294.0			7I2	1822.0		GFYAZUABYOOPCN	657	1894.0			GFYAZUABYOOPCN-UHFFFAOYSA-N
DB01083	Orlistat	96829-58-2	approved; investigational	AHLBNYSZXLDEJQ-FWEHEUNISA-N	InChI=1S/C29H53NO5/c1-5-7-9-11-12-13-14-15-16-18-24(34-29(33)26(30-22-31)20-23(3)4)21-27-25(28(32)35-27)19-17-10-8-6-2/h22-27H,5-21H2,1-4H3,(H,30,31)/t24-,25-,26-,27-/m0/s1	CCCCCCCCCCC[C@@H](C[C@@H]1OC(=O)[C@H]1CCCCCC)OC(=O)[C@H](CC(C)C)NC=O	C29H53NO5			3034010.0	46508309.0	94686.0	CHEMBL175247		2298564.0	24567.0	AHLBNYSZXLDEJQ	1037	4599.0			AHLBNYSZXLDEJQ-UHFFFAOYSA-N
DB01369	Quinupristin	120138-50-3	approved	WTHRRGMBUAHGNI-LCYNINFDSA-N	InChI=1S/C53H67N9O10S/c1-6-37-50(68)61-23-11-14-38(61)51(69)59(5)40(26-32-16-18-36(19-17-32)58(3)4)52(70)62-28-35(30-73-43-29-60-24-20-33(43)21-25-60)42(64)27-39(62)47(65)57-45(34-12-8-7-9-13-34)53(71)72-31(2)44(48(66)55-37)56-49(67)46-41(63)15-10-22-54-46/h7-10,12-13,15-19,22,31,33,35,37-40,43-45,63H,6,11,14,20-21,23-30H2,1-5H3,(H,55,66)(H,56,67)(H,57,65)/t31-,35+,37-,38+,39+,40+,43-,44+,45+/m1/…	[H][C@@]12CCCN1C(=O)[C@@H](CC)NC(=O)[C@@H](NC(=O)C1=NC=CC=C1O)[C@@H](C)OC(=O)[C@@H](NC(=O)[C@]1([H])CC(=O)[C@]([H])(CS[C@@H]3CN4CCC3CC4)CN1C(=O)[C@H](CC1=CC=C(C=C1)N(C)C)N(C)C2=O)C1=CC=CC=C1	C53H67N9O10S	C08032	D00852	5388937.0	46505148.0		CHEMBL1200649		4470884.0		WTHRRGMBUAHGNI	2336	71338.0	quinupristin	Anti-Infective Agents;Chemical Actions and Uses;Therapeutic Uses;Anti-Bacterial Agents;Pharmacologic Actions	WTHRRGMBUAHGNI-UHFFFAOYSA-N
DB01067	Glipizide	29094-61-9	approved; investigational	ZJJXGWJIGJFDTL-UHFFFAOYSA-N	InChI=1S/C21H27N5O4S/c1-15-13-24-19(14-23-15)20(27)22-12-11-16-7-9-18(10-8-16)31(29,30)26-21(28)25-17-5-3-2-4-6-17/h7-10,13-14,17H,2-6,11-12H2,1H3,(H,22,27)(H2,25,26,28)	CC1=NC=C(N=C1)C(=O)NCCC1=CC=C(C=C1)S(=O)(=O)NC(=O)NC1CCCCC1	C21H27N5O4S		D00335	3478.0	46505865.0	5384.0	CHEMBL1073		3359.0	50012956.0	ZJJXGWJIGJFDTL	36	3478.0	Glipizide	Hypoglycemic Agents;Chemical Actions and Uses;Pharmacologic Actions;Physiological Effects of Drugs	ZJJXGWJIGJFDTL-UHFFFAOYSA-N
DB08809	Dichloroacetic Acid	79-43-6	approved; investigational	JXTHNDFMNIQAHM-UHFFFAOYSA-N	InChI=1S/C2H2Cl2O2/c3-1(4)2(5)6/h1H,(H,5,6)	OC(=O)C(Cl)Cl	C2H2Cl2O2	C11149		6597.0	175427097.0	36386.0	CHEMBL13960	TF4	10771217.0	227588.0	JXTHNDFMNIQAHM	300	6597.0	Dichloroacetic Acid		JXTHNDFMNIQAHM-UHFFFAOYSA-N
DB05448	PX-12		investigational	BPBPYQWMFCTCNG-UHFFFAOYSA-N	InChI=1S/C7H12N2S2/c1-3-6(2)10-11-7-8-4-5-9-7/h4-6H,3H2,1-2H3,(H,8,9)	CCC(C)SSC1=NC=CN1	C7H12N2S2			219104.0	175427007.0	94291.0	CHEMBL406050		189920.0	50426071.0	BPBPYQWMFCTCNG	2775	219104.0	IV 2 compound		BPBPYQWMFCTCNG-UHFFFAOYSA-N
DB02712	Sorbinil	68367-52-2	experimental; investigational	LXANPKRCLVQAOG-NSHDSACASA-N	InChI=1S/C11H9FN2O3/c12-6-1-2-8-7(5-6)11(3-4-17-8)9(15)13-10(16)14-11/h1-2,5H,3-4H2,(H2,13,14,15,16)/t11-/m0/s1	FC1=CC=C2OCC[C@]3(NC(=O)NC3=O)C2=C1	C11H9FN2O3			337359.0	46504981.0	102029.0	CHEMBL266497	SBI	298991.0	16312.0	LXANPKRCLVQAOG	2425	5252.0			LXANPKRCLVQAOG-UHFFFAOYSA-N
DB02234	S-Ethylisothiourea	2986-20-1	experimental	VFIZBHJTOHUOEK-UHFFFAOYSA-N	InChI=1S/C3H8N2S/c1-2-6-3(4)5/h2H2,1H3,(H3,4,5)	CCSC(N)=N	C3H8N2S			5139.0	46508006.0		CHEMBL321691	ITU	4955.0	50055281.0	VFIZBHJTOHUOEK	1442	5139.0	etiron	Pharmacologic Actions;Central Nervous System Agents;Chemical Actions and Uses;Physiological Effects of Drugs;Therapeutic Uses;Molecular Mechanisms of Pharmacological Action;Enzyme Inhibitors;Cardiovascular Agents;Hypnotics and Sedatives;Vasoconstrictor Agents;Central Nervous System Depressants	VFIZBHJTOHUOEK-UHFFFAOYSA-N
DB02232	1,2-Dihydroxybenzene	120-80-9	experimental	YCIMNLLNPGFGHC-UHFFFAOYSA-N	InChI=1S/C6H6O2/c7-5-3-1-2-4-6(5)8/h1-4,7-8H	OC1=CC=CC=C1O	C6H6O2	C15571		289.0	46507748.0	18135.0	CHEMBL280998	CAQ	13837760.0	26188.0	YCIMNLLNPGFGHC	1324	289.0	catechol		YCIMNLLNPGFGHC-UHFFFAOYSA-N
DB04293	7-(2-Amino-2-Phenyl-Acetylamino)-3-Chloro-8-Oxo-1-Aza-Bicyclo[4.2.0]Oct-2-Ene-2-Carboxylic Acid		experimental	JAPHQRWPEGVNBT-IJLUTSLNSA-N	InChI=1S/C16H16ClN3O4/c17-9-6-7-10-12(15(22)20(10)13(9)16(23)24)19-14(21)11(18)8-4-2-1-3-5-8/h1-5,10-12H,6-7,18H2,(H,19,21)(H,23,24)/t10-,11-,12-/m1/s1	N[C@@H](C(=O)N[C@@H]1[C@H]2CCC(Cl)=C(N2C1=O)C(O)=O)C1=CC=CC=C1	C16H16ClN3O4			12897341.0	46507072.0		CHEMBL3545874	LOR	26330257.0		JAPHQRWPEGVNBT	94	3956.0			JAPHQRWPEGVNBT-UHFFFAOYSA-N
DB03989	D-Allopyranose	2595-97-3	experimental	WQZGKKKJIJFFOK-IVMDWMLBSA-N	InChI=1S/C6H12O6/c7-1-2-3(8)4(9)5(10)6(11)12-2/h2-11H,1H2/t2-,3-,4-,5-,6?/m1/s1	OC[C@H]1OC(O)[C@H](O)[C@H](O)[C@@H]1O	C6H12O6	C01487		439507.0	46505989.0	4093.0	CHEMBL1222152	ALL	388604.0		WQZGKKKJIJFFOK	1627	439680.0	beta-1,4-mannan		WQZGKKKJIJFFOK-RWOPYEJCSA-N
DB04534	5-Nitroindazole		experimental	WSGURAYTCUVDQL-UHFFFAOYSA-N	InChI=1S/C7H5N3O2/c11-10(12)6-1-2-7-5(3-6)4-8-9-7/h1-4H,(H,8,9)	O=N(=O)C1=CC=C2NN=CC2=C1	C7H5N3O2			21501.0	46505588.0		CHEMBL165372	5NI	20208.0	50304144.0	WSGURAYTCUVDQL	1798	21501.0	5-nitroindazole		WSGURAYTCUVDQL-UHFFFAOYSA-N
DB00912	Repaglinide	135062-02-1	approved; investigational	FAEKWTJYAYMJKF-QHCPKHFHSA-N	InChI=1S/C27H36N2O4/c1-4-33-25-17-20(12-13-22(25)27(31)32)18-26(30)28-23(16-19(2)3)21-10-6-7-11-24(21)29-14-8-5-9-15-29/h6-7,10-13,17,19,23H,4-5,8-9,14-16,18H2,1-3H3,(H,28,30)(H,31,32)/t23-/m0/s1	CCOC1=C(C=CC(CC(=O)N[C@@H](CC(C)C)C2=CC=CC=C2N2CCCCC2)=C1)C(O)=O	C27H36N2O4	C07670	D00594	65981.0	46508150.0	8805.0	CHEMBL1272		59377.0	50153520.0	FAEKWTJYAYMJKF	2362	65981.0	repaglinide	Pharmacologic Actions;Physiological Effects of Drugs;Hypoglycemic Agents;Chemical Actions and Uses	FAEKWTJYAYMJKF-QHCPKHFHSA-N
DB02994	Cacodylic acid	75-60-5	experimental	OGGXGZAMXPVRFZ-UHFFFAOYSA-N	InChI=1S/C2H7AsO2/c1-3(2,4)5/h1-2H3,(H,4,5)	C[As](C)(O)=O	C2H7AsO2	C07308		2513.0	46507712.0	48765.0	CHEMBL1231644	CAD	2418.0		OGGXGZAMXPVRFZ	3394	2513.0	Cacodylic Acid	Agrochemicals;Specialty Uses of Chemicals;Toxic Actions;Pesticides;Herbicides;Chemical Actions and Uses	OGGXGZAMXPVRFZ-UHFFFAOYSA-N
DB02991	S-Ethyl-N-[4-(Trifluoromethyl)Phenyl]Isothiourea		experimental	LCMOXIFARISMOH-UHFFFAOYSA-N	InChI=1S/C10H11F3N2S/c1-2-16-9(14)15-8-5-3-7(4-6-8)10(11,12)13/h3-6H,2H2,1H3,(H2,14,15)	CCS\C(N)=N\C1=CC=C(C=C1)C(F)(F)F	C10H11F3N2S			3311.0	46505446.0		CHEMBL323542	TFM	3195.0	50058464.0	LCMOXIFARISMOH	1601	3311.0	S-ethyl N-(4-(trifluoromethyl)phenyl)isothiourea		LCMOXIFARISMOH-UHFFFAOYSA-N
DB03056	4-Piperidino-Piperidine		experimental	QDVBKXJMLILLLB-UHFFFAOYSA-N	InChI=1S/C10H20N2/c1-2-8-12(9-3-1)10-4-6-11-7-5-10/h10-11H,1-9H2	C1CCN(CC1)C1CCNCC1	C10H20N2			78607.0	46507790.0	40117.0	CHEMBL174391	4PN	70964.0	50218206.0	QDVBKXJMLILLLB	708	78607.0	4-(1-piperidino)piperidine		QDVBKXJMLILLLB-UHFFFAOYSA-N
DB02589	Se-Ethyl-Isoselenourea		experimental	FFKYNFXDBBLWGF-UHFFFAOYSA-N	InChI=1S/C3H8N2Se/c1-2-6-3(4)5/h2H2,1H3,(H3,4,5)	CC[Se]C(N)=N	C3H8N2Se			449633.0	46504841.0			ISU	396099.0		FFKYNFXDBBLWGF	2363	449633.0			FFKYNFXDBBLWGF-UHFFFAOYSA-N
DB04018	S-Isopropyl-Isothiourea		experimental	XSSNABKEYXKKMK-UHFFFAOYSA-N	InChI=1S/C4H10N2S/c1-3(2)7-4(5)6/h3H,1-2H3,(H3,5,6)	CC(C)SC(N)=N	C4H10N2S			445319.0	46505190.0		CHEMBL483091	IPU	392993.0	50271827.0	XSSNABKEYXKKMK	2162	445319.0			XSSNABKEYXKKMK-UHFFFAOYSA-N
DB04392	Bishydroxy[2h-1-Benzopyran-2-One,1,2-Benzopyrone]		experimental	HIZKPJUTKKJDGA-BETUJISGSA-N	InChI=1S/C19H12O6/c20-16-10-5-1-3-7-14(10)24-18(22)12(16)9-13-17(21)11-6-2-4-8-15(11)25-19(13)23/h1-8,12-13H,9H2/t12-,13+	[H][C@@]1(C[C@@]2([H])C(=O)OC3=C(C=CC=C3)C2=O)C(=O)OC2=CC=CC=C2C1=O	C19H12O6			17753965.0	46508476.0			DTC	16743957.0		HIZKPJUTKKJDGA	723	17753965.0			HIZKPJUTKKJDGA-BETUJISGSA-N
DB00672	Chlorpropamide	94-20-2	approved; investigational	RKWGIWYCVPQPMF-UHFFFAOYSA-N	InChI=1S/C10H13ClN2O3S/c1-2-7-12-10(14)13-17(15,16)9-5-3-8(11)4-6-9/h3-6H,2,7H2,1H3,(H2,12,13,14)	CCCNC(=O)NS(=O)(=O)C1=CC=C(Cl)C=C1	C10H13ClN2O3S		D00271	2727.0	46506402.0	3650.0	CHEMBL498		2626.0	50344965.0	RKWGIWYCVPQPMF	2457	2727.0	Chlorpropamide	Hypoglycemic Agents;Physiological Effects of Drugs;Pharmacologic Actions;Chemical Actions and Uses	RKWGIWYCVPQPMF-UHFFFAOYSA-N
DB03974	L-Homoarginine		experimental	QUOGESRFPZDMMT-YFKPBYRVSA-N	InChI=1S/C7H16N4O2/c8-5(6(12)13)3-1-2-4-11-7(9)10/h5H,1-4,8H2,(H,12,13)(H4,9,10,11)/t5-/m0/s1	N[C@@H](CCCCNC(N)=N)C(O)=O	C7H16N4O2	C01924		9085.0	46506308.0	27747.0	CHEMBL589752	HRG	8732.0	50309588.0	QUOGESRFPZDMMT	751	9085.0	Homoarginine		QUOGESRFPZDMMT-YFKPBYRVSA-N
DB03975	Mercuribenzoic Acid		experimental	FVFZSVRSDNUCGG-UHFFFAOYSA-N	InChI=1S/C7H5O2.Hg/c8-7(9)6-4-2-1-3-5-6;/h2-5H,(H,8,9);	OC(=O)C1=CC=C([Hg])C=C1	C7H5HgO2			8747.0	46507167.0	28886.0		MBO	8417.0		FVFZSVRSDNUCGG	481	8747.0			FVFZSVRSDNUCGG-UHFFFAOYSA-N
DB01800	N,4-Dihydroxy-N-Oxo-3-(Sulfooxy)Benzenaminium		experimental	XMCCOOONGGUOLA-UHFFFAOYSA-N	InChI=1S/C6H5NO7S/c8-5-2-1-4(7(9)10)3-6(5)14-15(11,12)13/h1-3,8H,(H,11,12,13)	OC1=CC=C(C=C1OS(O)(=O)=O)[N+]([O-])=O	C6H5NO7S			165879.0	46505967.0	41733.0		CSN	145373.0		XMCCOOONGGUOLA	2892	165879.0	4-nitrocatechol sulfate		XMCCOOONGGUOLA-UHFFFAOYSA-N
DB01997	3-Bromo-7-Nitroindazole		experimental	NFSTZPMYAZRZPC-UHFFFAOYSA-N	InChI=1S/C7H4BrN3O2/c8-7-4-2-1-3-5(11(12)13)6(4)9-10-7/h1-3H,(H,9,10)	BrC1=NNC2=C1C=CC=C2N(=O)=O	C7H4BrN3O2			1649.0	46507791.0		CHEMBL479014	INE	1587.0	50270528.0	NFSTZPMYAZRZPC	1968	1649.0	3-bromo-7-nitroindazole		NFSTZPMYAZRZPC-UHFFFAOYSA-N
DB08214	4-(1H-IMIDAZOL-1-YL)PHENOL		experimental	CYKCUAPYWQDIKR-UHFFFAOYSA-N	InChI=1S/C9H8N2O/c12-9-3-1-8(2-4-9)11-6-5-10-7-11/h1-7,12H	OC1=CC=C(C=C1)N1C=CN=C1	C9H8N2O			82315.0	99444685.0		CHEMBL275339	MSR	74286.0	105193.0	CYKCUAPYWQDIKR	3627	82315.0			CYKCUAPYWQDIKR-UHFFFAOYSA-N
DB01689	Inhibitor Idd 384		experimental	CJKKMQCZOLCXAM-UHFFFAOYSA-N	InChI=1S/C19H22N2O5S/c1-12-6-4-5-7-15(12)10-17(22)21-16-8-13(2)19(14(3)9-16)27(25,26)20-11-18(23)24/h4-9,20H,10-11H2,1-3H3,(H,21,22)(H,23,24)	CC1=CC=CC=C1CC(=O)NC1=CC(C)=C(C(C)=C1)S(=O)(=O)NCC(O)=O	C19H22N2O5S			1944.0	46505474.0		CHEMBL240719	I84	1868.0	50222612.0	CJKKMQCZOLCXAM	1678	1944.0			CJKKMQCZOLCXAM-UHFFFAOYSA-N
DB02335	2-Aminothiazoline	1779-81-3	experimental	REGFWZVTTFGQOJ-UHFFFAOYSA-N	InChI=1S/C3H6N2S/c4-3-5-1-2-6-3/h1-2H2,(H2,4,5)	NC1=NCCS1	C3H6N2S			15689.0	46506807.0	40889.0	CHEMBL362148	ATQ	14923.0	50150920.0	REGFWZVTTFGQOJ	3645	15689.0	2-aminothiazoline		REGFWZVTTFGQOJ-UHFFFAOYSA-N
DB01110	Miconazole	22916-47-8	approved; investigational; vet_approved	BYBLEWFAAKGYCD-UHFFFAOYSA-N	InChI=1S/C18H14Cl4N2O/c19-13-2-1-12(16(21)7-13)10-25-18(9-24-6-5-23-11-24)15-4-3-14(20)8-17(15)22/h1-8,11,18H,9-10H2	ClC1=CC(Cl)=C(COC(CN2C=CN=C2)C2=C(Cl)C=C(Cl)C=C2)C=C1	C18H14Cl4N2O	C08070	D00882	4189.0	46506017.0	82892.0	CHEMBL91		4044.0	31772.0	BYBLEWFAAKGYCD	3812	4189.0	Miconazole	Metabolic Side Effects of Drugs and Substances;Steroid Synthesis Inhibitors;Therapeutic Uses;14-alpha Demethylase Inhibitors;Physiological Effects of Drugs;Cytochrome P-450 Enzyme Inhibitors;Enzyme Inhibitors;Molecular Mechanisms of Pharmacological Action;Antifungal Agents;Hormone Antagonists;Hormones, Hormone Substitutes, and Hormone Antagonists;Anti-Infective Agents;Chemical Actions and Uses;Ph…	BYBLEWFAAKGYCD-UHFFFAOYSA-N
DB02709	Resveratrol	501-36-0	approved; experimental; investigational	LUKBXSAWLPMMSZ-OWOJBTEDSA-N	InChI=1S/C14H12O3/c15-12-5-3-10(4-6-12)1-2-11-7-13(16)9-14(17)8-11/h1-9,15-17H/b2-1+	OC1=CC=C(\C=C\C2=CC(O)=CC(O)=C2)C=C1	C14H12O3	C03582		445154.0	46504705.0	45713.0	CHEMBL165	STL	392875.0	23926.0	LUKBXSAWLPMMSZ	841	46782864.0			LUKBXSAWLPMMSZ-OYESDQHJSA-N
DB08741	5-[[(2R)-2-cyclopropyl-7,8-dimethoxy-2H-chromen-5-yl]methyl]pyrimidine-2,4-diamine		experimental	HWJPWWYTGBZDEG-AWEZNQCLSA-N	InChI=1S/C19H22N4O3/c1-24-15-8-11(7-12-9-22-19(21)23-18(12)20)13-5-6-14(10-3-4-10)26-16(13)17(15)25-2/h5-6,8-10,14H,3-4,7H2,1-2H3,(H4,20,21,22,23)/t14-/m0/s1	[H][C@@]1(OC2=C(OC)C(OC)=CC(CC3=C(N)N=C(N)N=C3)=C2C=C1)C1CC1	C19H22N4O3			10247560.0	99445212.0	131752.0	CHEMBL1236788	XCF	8423047.0	50336513.0	HWJPWWYTGBZDEG	869	213043.0	iclaprim	Chemical Actions and Uses;Pharmacologic Actions;Folic Acid Antagonists;Enzyme Inhibitors;Molecular Mechanisms of Pharmacological Action	HWJPWWYTGBZDEG-UHFFFAOYSA-N
DB07938	5-[[(2R)-2-cyclopropyl-7,8-dimethoxy-chroman-5-yl]methyl]pyrimidine-2,4-diamine		experimental	HWJPWWYTGBZDEG-CQSZACIVSA-N	InChI=1S/C19H22N4O3/c1-24-15-8-11(7-12-9-22-19(21)23-18(12)20)13-5-6-14(10-3-4-10)26-16(13)17(15)25-2/h5-6,8-10,14H,3-4,7H2,1-2H3,(H4,20,21,22,23)/t14-/m1/s1	[H][C@]1(OC2=C(C=C1)C(CC1=CNC(=N)NC1=N)=CC(OC)=C2OC)C1CC1	C19H22N4O3			44141864.0	99444409.0	131753.0	CHEMBL1673303	I2H		50336514.0	HWJPWWYTGBZDEG	869	213043.0	iclaprim	Chemical Actions and Uses;Pharmacologic Actions;Folic Acid Antagonists;Enzyme Inhibitors;Molecular Mechanisms of Pharmacological Action	HWJPWWYTGBZDEG-UHFFFAOYSA-N
DB02381	nor-NOHA	189302-40-7	investigational	KOBHCUDVWOTEKO-VKHMYHEASA-N	InChI=1S/C5H12N4O3/c6-3(4(10)11)1-2-8-5(7)9-12/h3,12H,1-2,6H2,(H,10,11)(H3,7,8,9)/t3-/m0/s1	N[C@@H](CCNC(=N)NO)C(O)=O	C5H12N4O3			446124.0	46505343.0		CHEMBL1234777	NNH	393563.0	50008099.0	KOBHCUDVWOTEKO	240	3253680.0			KOBHCUDVWOTEKO-UHFFFAOYSA-N
DB01606	Tazobactam	89786-04-9	approved	LPQZKKCYTLCDGQ-WEDXCCLWSA-N	InChI=1S/C10H12N4O5S/c1-10(5-13-3-2-11-12-13)8(9(16)17)14-6(15)4-7(14)20(10,18)19/h2-3,7-8H,4-5H2,1H3,(H,16,17)/t7-,8+,10+/m1/s1	[H][C@@]12CC(=O)N1[C@@H](C(O)=O)[C@](C)(CN1C=CN=N1)S2(=O)=O	C10H12N4O5S	C07771	D00660	123630.0	46508088.0	9421.0	CHEMBL404		110216.0	50053173.0	LPQZKKCYTLCDGQ	342	4836.0			LPQZKKCYTLCDGQ-UHFFFAOYSA-N
DB07139	3-[5-(3-nitrophenyl)thiophen-2-yl]propanoic acid		experimental	IHKCOKRMJRDWAL-UHFFFAOYSA-N	InChI=1S/C13H11NO4S/c15-13(16)7-5-11-4-6-12(19-11)9-2-1-3-10(8-9)14(17)18/h1-4,6,8H,5,7H2,(H,15,16)	OC(=O)CCC1=CC=C(S1)C1=CC(=CC=C1)[N+]([O-])=O	C13H11NO4S			25210476.0	99443610.0			53N	25056818.0		IHKCOKRMJRDWAL	1244	25210476.0			IHKCOKRMJRDWAL-UHFFFAOYSA-N
DB00731	Nateglinide	105816-04-4	approved; investigational	OELFLUMRDSZNSF-BRWVUGGUSA-N	InChI=1S/C19H27NO3/c1-13(2)15-8-10-16(11-9-15)18(21)20-17(19(22)23)12-14-6-4-3-5-7-14/h3-7,13,15-17H,8-12H2,1-2H3,(H,20,21)(H,22,23)/t15-,16-,17-/m1/s1	[H][C@](CC1=CC=CC=C1)(N=C(O)[C@@]1([H])CC[C@@]([H])(CC1)C(C)C)C(O)=O	C19H27NO3	C12508	D01111	5311309.0	46504836.0	31897.0	CHEMBL783		10482084.0	50344967.0	OELFLUMRDSZNSF	451	60026.0			OELFLUMRDSZNSF-JCYILVPMSA-N
DB05383	Pimagedine	79-17-4	investigational	HAMNKKUPIHEESI-UHFFFAOYSA-N	InChI=1S/CH6N4/c2-1(3)5-4/h4H2,(H4,2,3,5)	NNC(N)=N	CH6N4			2146.0	175426990.0	40618.0	CHEMBL225304	AGU	2061.0	50207159.0	HAMNKKUPIHEESI	45	2146.0	pimagedine	Chemical Actions and Uses;Enzyme Inhibitors;Molecular Mechanisms of Pharmacological Action;Pharmacologic Actions	HAMNKKUPIHEESI-UHFFFAOYSA-N
DB04628	Allosamidin	103782-08-7	experimental	MDWNFWDBQGOKNZ-XYUDZHFQSA-N	InChI=1S/C25H42N4O14/c1-8(33)26-14-17(36)16(35)11(6-31)39-23(14)42-22-12(7-32)40-24(15(19(22)38)27-9(2)34)41-21-10(5-30)20-13(18(21)37)28-25(43-20)29(3)4/h10-24,30-32,35-38H,5-7H2,1-4H3,(H,26,33)(H,27,34)/t10-,11+,12+,13+,14+,15+,16+,17-,18+,19-,20-,21+,22+,23-,24-/m0/s1	CN(C)C1=N[C@@H]2[C@@H](O)[C@H](O[C@@H]3O[C@H](CO)[C@@H](O[C@@H]4O[C@H](CO)[C@@H](O)[C@@H](O)[C@H]4NC(C)=O)[C@@H](O)[C@H]3NC(C)=O)[C@@H](CO)[C@@H]2O1	C25H42N4O14	C05346		119339.0	46506500.0		CHEMBL1230997	AO3	106593.0	50331851.0	MDWNFWDBQGOKNZ	112	119339.0	allosamidin	Agrochemicals;Molecular Mechanisms of Pharmacological Action;Chemical Actions and Uses;Specialty Uses of Chemicals;Toxic Actions;Pesticides;Insecticides;Pharmacologic Actions;Enzyme Inhibitors	MDWNFWDBQGOKNZ-XYUDZHFQSA-N
DB02207	7-Nitroindazole	2942-42-9	experimental	PQCAUHUKTBHUSA-UHFFFAOYSA-N	InChI=1S/C7H5N3O2/c11-10(12)6-3-1-2-5-4-8-9-7(5)6/h1-4H,(H,8,9)	O=N(=O)C1=CC=CC2=CNN=C12	C7H5N3O2			1893.0	46504896.0		CHEMBL247378	7NI	1821.0	50209245.0	PQCAUHUKTBHUSA	2353	1893.0	7-nitroindazole	Peripheral Nervous System Agents;Anticonvulsants;Anti-Anxiety Agents;Therapeutic Uses;Analgesics;Sensory System Agents;Central Nervous System Agents;Chemical Actions and Uses;Physiological Effects of Drugs;Protective Agents;Psychotropic Drugs;Pharmacologic Actions;Central Nervous System Depressants;Enzyme Inhibitors;Tranquilizing Agents;Molecular Mechanisms of Pharmacological Action;Neuroprotecti…	PQCAUHUKTBHUSA-UHFFFAOYSA-N
DB00120	L-Phenylalanine	63-91-2	approved; investigational; nutraceutical	COLNVLDHVKWLRT-QMMMGPOBSA-N	InChI=1S/C9H11NO2/c10-8(9(11)12)6-7-4-2-1-3-5-7/h1-5,8H,6,10H2,(H,11,12)/t8-/m0/s1	N[C@@H](CC1=CC=CC=C1)C(O)=O	C9H11NO2	C00079	D00021	6140.0	46505708.0	17295.0	CHEMBL301523	PHE	5910.0	18073.0	COLNVLDHVKWLRT	91	6140.0	Phenylalanine		COLNVLDHVKWLRT-QMMMGPOBSA-N
DB07599	[(2-AMINO-ALPHA-METHOXYIMINO-4-THIAZOLYLACETYL)AMINO]METHYLBORONIC ACID		experimental	FMYGJTQJYFMFCR-XGICHPGQSA-N	InChI=1S/C7H11BN4O4S/c1-16-12-5(4-2-17-7(9)11-4)6(13)10-3-8(14)15/h2,14-15H,3H2,1H3,(H2,9,11)(H,10,13)/b12-5-	CO\N=C(/C(=O)NCB(O)O)C1=CSC(N)=N1	C7H11BN4O4S			9600412.0	99444070.0		CHEMBL227452	CXB	7874552.0	50202234.0	FMYGJTQJYFMFCR	1488	9600412.0			FMYGJTQJYFMFCR-XGICHPGQSA-N
DB03068	Zebularine	3690-10-6	experimental	RPQZTTQVRYEKCR-WCTZXXKLSA-N	InChI=1S/C9H12N2O5/c12-4-5-6(13)7(14)8(16-5)11-3-1-2-10-9(11)15/h1-3,5-8,12-14H,4H2/t5-,6-,7-,8-/m1/s1	OC[C@H]1O[C@H]([C@H](O)[C@@H]1O)N1C=CC=NC1=O	C9H12N2O5			100016.0	46504541.0	46938.0	CHEMBL504567	ZE8	90372.0		RPQZTTQVRYEKCR	2364	100016.0	pyrimidin-2-one beta-ribofuranoside		RPQZTTQVRYEKCR-WCTZXXKLSA-N
DB03904	Urea	57-13-6	approved; investigational	XSQUKJJJFZCRTK-UHFFFAOYSA-N	InChI=1S/CH4N2O/c2-1(3)4/h(H4,2,3,4)	NC(N)=O	CH4N2O	C00086	D00023	1176.0	46508687.0	16199.0	CHEMBL985	URE	1143.0	24961.0	XSQUKJJJFZCRTK	311	1176.0	Urea		XSQUKJJJFZCRTK-UHFFFAOYSA-N
DB03424	Ubenimex	58970-76-6	experimental; investigational	VGGGPCQERPFHOB-RDBSUJKOSA-N	InChI=1S/C16H24N2O4/c1-10(2)8-13(16(21)22)18-15(20)14(19)12(17)9-11-6-4-3-5-7-11/h3-7,10,12-14,19H,8-9,17H2,1-2H3,(H,18,20)(H,21,22)/t12-,13+,14+/m1/s1	[H][C@@](N)(CC1=CC=CC=C1)[C@]([H])(O)C(O)=N[C@@]([H])(CC(C)C)C(O)=O	C16H24N2O4			72172.0	46505598.0		CHEMBL29292	BES	65145.0	50367209.0	VGGGPCQERPFHOB	1621	3238.0			VGGGPCQERPFHOB-UHFFFAOYSA-N
DB08258	6-{[(CYCLOHEXYLAMINO)CARBONYL]AMINO}HEXANOIC ACID		experimental	KFTVEPYSUSWBRD-UHFFFAOYSA-N	InChI=1S/C13H24N2O3/c16-12(17)9-5-2-6-10-14-13(18)15-11-7-3-1-4-8-11/h11H,1-10H2,(H,16,17)(H2,14,15,18)	OC(=O)CCCCCNC(=O)NC1CCCCC1	C13H24N2O3			6420120.0	99444729.0		CHEMBL434374	NC6	4925685.0	50192966.0	KFTVEPYSUSWBRD	2569	6420120.0			KFTVEPYSUSWBRD-UHFFFAOYSA-N
DB12610	Ebselen	60940-34-3	investigational	DYEFUKCXAQOFHX-UHFFFAOYSA-N	InChI=1S/C13H9NOSe/c15-13-11-8-4-5-9-12(11)16-14(13)10-6-2-1-3-7-10/h1-9H	O=C1N([Se]C2=CC=CC=C12)C1=CC=CC=C1	C13H9NOSe			3194.0	347828824.0	77543.0	CHEMBL51085		3082.0	34233.0	DYEFUKCXAQOFHX	1308	3194.0	ebselen	Physiological Effects of Drugs;Pharmacologic Actions;Sensory System Agents;Antirheumatic Agents;Anti-Inflammatory Agents;Protective Agents;Central Nervous System Agents;Gastrointestinal Agents;Molecular Mechanisms of Pharmacological Action;Peripheral Nervous System Agents;Therapeutic Uses;Specialty Uses of Chemicals;Anti-Ulcer Agents;Enzyme Inhibitors;Analgesics, Non-Narcotic;Analgesics;Antioxida…	DYEFUKCXAQOFHX-UHFFFAOYSA-N
DB08256	N-[(CYCLOHEXYLAMINO)CARBONYL]GLYCINE		experimental	NVORCMBCUHQRDL-UHFFFAOYSA-N	InChI=1S/C9H16N2O3/c12-8(13)6-10-9(14)11-7-4-2-1-3-5-7/h7H,1-6H2,(H,12,13)(H2,10,11,14)	OC(=O)CNC(=O)NC1CCCCC1	C9H16N2O3			4149241.0	99444727.0		CHEMBL66380	NC3	3361505.0	50143914.0	NVORCMBCUHQRDL	2293	4149241.0			NVORCMBCUHQRDL-UHFFFAOYSA-N
DB08257	4-{[(CYCLOHEXYLAMINO)CARBONYL]AMINO}BUTANOIC ACID		experimental	WSVFRGGLURJIMG-UHFFFAOYSA-N	InChI=1S/C11H20N2O3/c14-10(15)7-4-8-12-11(16)13-9-5-2-1-3-6-9/h9H,1-8H2,(H,14,15)(H2,12,13,16)	OC(=O)CCCNC(=O)NC1CCCCC1	C11H20N2O3			6420119.0	99444728.0		CHEMBL219695	NC4	4925684.0	50192936.0	WSVFRGGLURJIMG	813	6420119.0			WSVFRGGLURJIMG-UHFFFAOYSA-N
DB01833	L-2-Amino-4-(Guanidinooxy)Butyric Acid		experimental	FSBIGDSBMBYOPN-VKHMYHEASA-N	InChI=1S/C5H12N4O3/c6-3(4(10)11)1-2-12-9-5(7)8/h3H,1-2,6H2,(H,10,11)(H4,7,8,9)/t3-/m0/s1	N[C@@H](CCONC(N)=N)C(O)=O	C5H12N4O3	C00308		439202.0	46507101.0	609827.0	CHEMBL443732	GGB	388342.0	50370459.0	FSBIGDSBMBYOPN	1238	275.0			FSBIGDSBMBYOPN-UHFFFAOYSA-N
DB01835	4r-Fluoro-N6-Ethanimidoyl-L-Lysine		experimental	LTCJJIZTKXNFGK-RQJHMYQMSA-N	InChI=1S/C8H16FN3O2/c1-5(10)12-3-2-6(9)4-7(11)8(13)14/h6-7H,2-4,11H2,1H3,(H2,10,12)(H,13,14)/t6-,7+/m1/s1	CC(=N)NCC[C@@H](F)C[C@H](N)C(O)=O	C8H16FN3O2			448269.0	46508853.0			I58	395122.0		LTCJJIZTKXNFGK	965	448269.0			LTCJJIZTKXNFGK-RQJHMYQMSA-N
DB02061	Cellobiose	528-50-7	experimental	GUBGYTABKSRVRQ-CUHNMECISA-N	InChI=1S/C12H22O11/c13-1-3-5(15)6(16)9(19)12(22-3)23-10-4(2-14)21-11(20)8(18)7(10)17/h3-20H,1-2H2/t3-,4-,5-,6+,7-,8-,9-,10-,11?,12+/m1/s1	OC[C@H]1O[C@@H](O[C@H]2[C@H](O)[C@@H](O)C(O)O[C@@H]2CO)[C@H](O)[C@@H](O)[C@@H]1O	C12H22O11	C00185		439178.0	46505046.0	17057.0		CBI	388323.0		GUBGYTABKSRVRQ	1944	294.0	Maltose	Food Ingredients;Chemical Actions and Uses;Specialty Uses of Chemicals;Sweetening Agents;Flavoring Agents;Food Additives	GUBGYTABKSRVRQ-UHFFFAOYSA-N
DB03911	L-Xylopyranose		experimental	SRBFZHDQGSBBOR-CZBDKTQLSA-N	InChI=1S/C5H10O5/c6-2-1-10-5(9)4(8)3(2)7/h2-9H,1H2/t2-,3+,4-,5?/m0/s1	O[C@H]1COC(O)[C@@H](O)[C@@H]1O	C5H10O5			439509.0	46508015.0	59275.0	CHEMBL1374069	LXC	388606.0		SRBFZHDQGSBBOR	401	229.0			SRBFZHDQGSBBOR-UHFFFAOYSA-N
DB03192	3r-Hydroxydecanoyl-Coa		experimental	HIVSMYZAMUNFKZ-PDQACDDGSA-N	InChI=1S/C31H54N7O18P3S/c1-4-5-6-7-8-9-19(39)14-22(41)60-13-12-33-21(40)10-11-34-29(44)26(43)31(2,3)16-53-59(50,51)56-58(48,49)52-15-20-25(55-57(45,46)47)24(42)30(54-20)38-18-37-23-27(32)35-17-36-28(23)38/h17-20,24-26,30,39,42-43H,4-16H2,1-3H3,(H,33,40)(H,34,44)(H,48,49)(H,50,51)(H2,32,35,36)(H2,45,46,47)/t19-,20-,24-,25-,26+,30-/m1/s1	[H][C@@](O)(CCCCCCC)CC(=O)SCCN=C(O)CCN=C(O)[C@]([H])(O)C(C)(C)COP(O)(=O)OP(O)(=O)OC[C@@]1([H])O[C@@]([H])(N2C=NC3=C(N)N=CN=C23)[C@]([H])(O)[C@]1([H])OP(O)(O)=O	C31H54N7O18P3S			447877.0	46504729.0	74405.0		HDC	394845.0		HIVSMYZAMUNFKZ	2798	440605.0	3-hydroxydecanoyl-coenzyme A		HIVSMYZAMUNFKZ-FHRNIPIGSA-N
DB03034	D-Levofloxacin	100986-86-5	experimental	GSDSWSVVBLHKDQ-SNVBAGLBSA-N	InChI=1S/C18H20FN3O4/c1-10-9-26-17-14-11(16(23)12(18(24)25)8-22(10)14)7-13(19)15(17)21-5-3-20(2)4-6-21/h7-8,10H,3-6,9H2,1-2H3,(H,24,25)/t10-/m1/s1	C[C@@H]1COC2=C(N3CCN(C)CC3)C(F)=CC3=C2N1C=C(C(O)=O)C3=O	C18H20FN3O4			452723.0	46506037.0		CHEMBL420937	XED	398760.0		GSDSWSVVBLHKDQ	3773	149096.0	Levofloxacin	Topoisomerase II Inhibitors;Pharmacologic Actions;Cytochrome P-450 CYP1A2 Inhibitors;Antineoplastic Agents;Anti-Infective Agents, Urinary;Metabolic Side Effects of Drugs and Substances;Molecular Mechanisms of Pharmacological Action;Anti-Bacterial Agents;Cytochrome P-450 Enzyme Inhibitors;Renal Agents;Therapeutic Uses;Chemical Actions and Uses;Topoisomerase Inhibitors;Anti-Infective Agents;Enzyme …	GSDSWSVVBLHKDQ-JTQLQIEISA-N
DB01644	3,6-Dihydroxy-Xanthene-9-Propionic Acid		experimental	PFQGLFBMMPZYEU-UHFFFAOYSA-N	InChI=1S/C16H14O5/c17-9-1-3-12-11(5-6-16(19)20)13-4-2-10(18)8-15(13)21-14(12)7-9/h1-4,7-8,11,17-18H,5-6H2,(H,19,20)	OC(=O)CCC1C2=CC=C(O)C=C2OC2=C1C=CC(O)=C2	C16H14O5			449159.0	46507003.0			HXP	395767.0		PFQGLFBMMPZYEU	698	449159.0			PFQGLFBMMPZYEU-UHFFFAOYSA-N
DB03608	Diminazene	536-71-0	experimental	XNYZHCFCZNMTFY-UHFFFAOYSA-N	InChI=1S/C14H15N7/c15-13(16)9-1-5-11(6-2-9)19-21-20-12-7-3-10(4-8-12)14(17)18/h1-8H,(H3,15,16)(H3,17,18)(H,19,20)	NC(=N)C1=CC=C(N\N=N\C2=CC=C(C=C2)C(N)=N)C=C1	C14H15N7	C18388		2354.0	46504758.0	81724.0	CHEMBL35241	BRN	2264.0	50000999.0	XNYZHCFCZNMTFY	2718	2354.0	Diminazene	Antiprotozoal Agents;Pharmacologic Actions;Anti-Infective Agents;Chemical Actions and Uses;Trypanocidal Agents;Antiparasitic Agents;Therapeutic Uses	XNYZHCFCZNMTFY-UHFFFAOYSA-N
DB04062	Beta-D-Fucose		experimental	SHZGCJCMOBCMKK-FPRJBGLDSA-N	InChI=1S/C6H12O5/c1-2-3(7)4(8)5(9)6(10)11-2/h2-10H,1H3/t2-,3+,4+,5-,6-/m1/s1	C[C@H]1O[C@@H](O)[C@H](O)[C@@H](O)[C@H]1O	C6H12O5	C02095		439650.0	46508752.0	27442.0		FCB	388721.0		SHZGCJCMOBCMKK	23	71315513.0			SHZGCJCMOBCMKK-DLABPRKASA-N
DB03485	Alpha-D-Fucose		experimental	SHZGCJCMOBCMKK-PHYPRBDBSA-N	InChI=1S/C6H12O5/c1-2-3(7)4(8)5(9)6(10)11-2/h2-10H,1H3/t2-,3+,4+,5-,6+/m1/s1	C[C@H]1O[C@H](O)[C@H](O)[C@@H](O)[C@H]1O	C6H12O5			444200.0	46505015.0	42564.0	CHEMBL609880	FCA	392189.0		SHZGCJCMOBCMKK	23	71315513.0			SHZGCJCMOBCMKK-DLABPRKASA-N
DB06851	N-(pyridin-3-ylmethyl)aniline		experimental	BJXLHKJBRORJJJ-UHFFFAOYSA-N	InChI=1S/C12H12N2/c1-2-6-12(7-3-1)14-10-11-5-4-8-13-9-11/h1-9,14H,10H2	C(NC1=CC=CC=C1)C1=CC=CN=C1	C12H12N2			1082702.0	99443322.0		CHEMBL264669	11X	923306.0	50294172.0	BJXLHKJBRORJJJ	2965	1082702.0			BJXLHKJBRORJJJ-UHFFFAOYSA-N
DB00766	Clavulanic acid	58001-44-8	approved; vet_approved	HZZVJAQRINQKSD-PBFISZAISA-N	InChI=1S/C8H9NO5/c10-2-1-4-7(8(12)13)9-5(11)3-6(9)14-4/h1,6-7,10H,2-3H2,(H,12,13)/b4-1-/t6-,7-/m1/s1	[H][C@@]12CC(=O)N1[C@@H](C(O)=O)\C(O2)=C\CO	C8H9NO5	C06662		5280980.0	46508845.0	48947.0	CHEMBL777	J01	4444466.0	50021959.0	HZZVJAQRINQKSD	1440	2172.0			HZZVJAQRINQKSD-UHFFFAOYSA-N
DB04368	Bb-3497	235784-88-0	experimental	AVDLWYHBABSSHC-CHWSQXEVSA-N	InChI=1S/C16H31N3O4/c1-7-8-9-12(10-19(23)11-20)14(21)17-13(16(2,3)4)15(22)18(5)6/h11-13,23H,7-10H2,1-6H3,(H,17,21)/t12-,13-/m1/s1	[H][C@@](CCCC)(CN(O)C=O)C(=O)N[C@]([H])(C(=O)N(C)C)C(C)(C)C	C16H31N3O4			159596.0	46504617.0		CHEMBL431210	BB1	140323.0	50104501.0	AVDLWYHBABSSHC	1216	159596.0	BB3497		AVDLWYHBABSSHC-CHWSQXEVSA-N
DB07496	1,3-DIPHENYLUREA		experimental	GWEHVDNNLFDJLR-UHFFFAOYSA-N	InChI=1S/C13H12N2O/c16-13(14-11-7-3-1-4-8-11)15-12-9-5-2-6-10-12/h1-10H,(H2,14,15,16)	O=C(NC1=CC=CC=C1)NC1=CC=CC=C1	C13H12N2O			7595.0	99443967.0	41320.0	CHEMBL354676	BSU	7314.0	25725.0	GWEHVDNNLFDJLR	2468	7595.0			GWEHVDNNLFDJLR-UHFFFAOYSA-N
DB02644	N-Omega-Propyl-L-Arginine		experimental	AOMXURITGZJPKB-ZETCQYMHSA-O	InChI=1S/C9H20N4O2/c1-2-5-12-9(11)13-6-3-4-7(10)8(14)15/h7H,2-6,10H2,1H3,(H,14,15)(H3,11,12,13)/p+1/t7-/m0/s1	CCCNC(=[NH2+])NCCC[C@H](N)C(O)=O	C9H21N4O2			5287494.0	46507586.0			3AR	4449861.0		AOMXURITGZJPKB	933	4387.0			AOMXURITGZJPKB-UHFFFAOYSA-N
DB00266	Dicoumarol	66-76-2	approved	DOBMPNYZJYQDGZ-UHFFFAOYSA-N	InChI=1S/C19H12O6/c20-16-10-5-1-3-7-14(10)24-18(22)12(16)9-13-17(21)11-6-2-4-8-15(11)25-19(13)23/h1-8,20-21H,9H2	OC1=C(CC2=C(O)C3=C(OC2=O)C=CC=C3)C(=O)OC2=C1C=CC=C2	C19H12O6	C00796	D03798	54676038.0	46505536.0	4513.0	CHEMBL1466		10183330.0	35525.0	DOBMPNYZJYQDGZ	3361	25201794.0			DOBMPNYZJYQDGZ-UHFFFAOYSA-L
DB00262	Carmustine	154-93-8	approved; investigational	DLGOEMSEDOSKAD-UHFFFAOYSA-N	InChI=1S/C5H9Cl2N3O2/c6-1-3-8-5(11)10(9-12)4-2-7/h1-4H2,(H,8,11)	ClCCNC(=O)N(CCCl)N=O	C5H9Cl2N3O2	C06873	D00254	2578.0	46506980.0	3423.0	CHEMBL513		2480.0	50015950.0	DLGOEMSEDOSKAD	2383	2578.0	Carmustine	Toxic Actions;Antineoplastic Agents, Alkylating;Pharmacologic Actions;Antineoplastic Agents;Molecular Mechanisms of Pharmacological Action;Noxae;Alkylating Agents;Chemical Actions and Uses;Therapeutic Uses	DLGOEMSEDOSKAD-UHFFFAOYSA-N
DB03305	N5-Iminoethyl-L-Ornithine		experimental	UYZFAUAYFLEHRC-LURJTMIESA-N	InChI=1S/C7H15N3O2/c1-5(8)10-4-2-3-6(9)7(11)12/h6H,2-4,9H2,1H3,(H2,8,10)(H,11,12)/t6-/m0/s1	[H][C@](N)(CCCNC(C)=N)C(O)=O	C7H15N3O2			107984.0	46507343.0		CHEMBL11471	ILO	97098.0	50072297.0	UYZFAUAYFLEHRC	1480	107984.0	N(G)-iminoethylornithine	Molecular Mechanisms of Pharmacological Action;Enzyme Inhibitors;Pharmacologic Actions;Chemical Actions and Uses	UYZFAUAYFLEHRC-LURJTMIESA-N
DB05327	Ranirestat	147254-64-6	investigational	QCVNMNYRNIMDKV-QGZVFWFLSA-N	InChI=1S/C17H11BrFN3O4/c18-10-4-3-9(11(19)6-10)8-21-14(24)12-2-1-5-22(12)17(16(21)26)7-13(23)20-15(17)25/h1-6H,7-8H2,(H,20,23,25)/t17-/m1/s1	FC1=C(CN2C(=O)C3=CC=CN3[C@@]3(CC(=O)NC3=O)C2=O)C=CC(Br)=C1	C17H11BrFN3O4			153948.0	175426978.0		CHEMBL334830		135685.0	50067407.0	QCVNMNYRNIMDKV	1544	9953887.0			QCVNMNYRNIMDKV-UHFFFAOYSA-N
DB02895	3-(Prop-2-Ene-1-Sulfinyl)-Propene-1-Thiol		experimental	HSVQDVSVQIMRSS-CDAZIORVSA-N	InChI=1S/C6H10OS2/c1-2-5-9(7)6-3-4-8/h2-4,8H,1,5-6H2/b4-3+/t9-/m1/s1	S\C=C\C[S@](=O)CC=C	C6H10OS2			9543424.0	46505601.0			AJ3	7822391.0		HSVQDVSVQIMRSS	1193	9543424.0			HSVQDVSVQIMRSS-CDAZIORVSA-N
DB03106	scyllo-inositol	488-59-5	investigational	CDAISMWEOUEBRE-CDRYSYESSA-N	InChI=1S/C6H12O6/c7-1-2(8)4(10)6(12)5(11)3(1)9/h1-12H/t1-,2-,3+,4+,5-,6-	O[C@H]1[C@H](O)[C@@H](O)[C@H](O)[C@@H](O)[C@@H]1O	C6H12O6	C06153		892.0	46505198.0	10642.0	CHEMBL468154	2H3	10254646.0		CDAISMWEOUEBRE	3092	892.0	scyllitol		CDAISMWEOUEBRE-UHFFFAOYSA-N
DB02020	Alrestatin	51411-04-2	experimental	GCUCIFQCGJIRNT-UHFFFAOYSA-N	InChI=1S/C14H9NO4/c16-11(17)7-15-13(18)9-5-1-3-8-4-2-6-10(12(8)9)14(15)19/h1-6H,7H2,(H,16,17)	OC(=O)CN1C(=O)C2=CC=CC3=CC=CC(C1=O)=C23	C14H9NO4			2120.0	46508635.0		CHEMBL63055	ALR	2036.0	16415.0	GCUCIFQCGJIRNT	1773	2120.0	alrestatin	Pharmacologic Actions;Chemical Actions and Uses;Parasympatholytics;Physiological Effects of Drugs;Enzyme Inhibitors;Autonomic Agents;Molecular Mechanisms of Pharmacological Action;Peripheral Nervous System Agents	GCUCIFQCGJIRNT-UHFFFAOYSA-N
DB03411	2-Hydroxymethyl-Pyrrolidine-3,4-Diol		experimental	OQEBIHBLFRADNM-YUPRTTJUSA-N	InChI=1S/C5H11NO3/c7-2-3-5(9)4(8)1-6-3/h3-9H,1-2H2/t3-,4-,5-/m0/s1	OC[C@@H]1NC[C@H](O)[C@H]1O	C5H11NO3			127716.0	46504688.0		CHEMBL406973	EDG	113295.0	50375511.0	OQEBIHBLFRADNM	3257	1335.0			OQEBIHBLFRADNM-UHFFFAOYSA-N
DB00848	Levamisole	14769-73-4	approved; investigational; vet_approved; withdrawn	HLFSDGLLUJUHTE-SNVBAGLBSA-N	InChI=1S/C11H12N2S/c1-2-4-9(5-3-1)10-8-13-6-7-14-11(13)12-10/h1-5,10H,6-8H2/t10-/m1/s1	C1CN2C[C@@H](N=C2S1)C1=CC=CC=C1	C11H12N2S	C07070	D08114	26879.0	46509052.0	6432.0	CHEMBL1454		25037.0	50241179.0	HLFSDGLLUJUHTE	391	26879.0	Levamisole	Antirheumatic Agents;Antinematodal Agents;Immunologic Factors;Anti-Infective Agents;Adjuvants, Immunologic;Antiparasitic Agents;Therapeutic Uses;Pharmacologic Actions;Chemical Actions and Uses;Physiological Effects of Drugs;Anthelmintics	HLFSDGLLUJUHTE-SNVBAGLBSA-N
DB03640	Beta-Hydroxyaspartic Acid		experimental	YYLQUHNPNCGKJQ-NHYDCYSISA-N	InChI=1S/C4H7NO5/c5-1(3(7)8)2(6)4(9)10/h1-2,6H,5H2,(H,7,8)(H,9,10)/t1-,2+/m0/s1	N[C@@H]([C@@H](O)C(O)=O)C(O)=O	C4H7NO5	C03961		14463.0	46508333.0	17576.0	CHEMBL3317781	BH2	13809.0		YYLQUHNPNCGKJQ	3346	5425.0	3-hydroxyaspartic acid		YYLQUHNPNCGKJQ-UHFFFAOYSA-N
DB02731	Ethylmercurithiosalicylic acid	148-61-8	experimental	HXQVQGWHFRNKMS-UHFFFAOYSA-M	InChI=1S/C7H6O2S.C2H5.Hg/c8-7(9)5-3-1-2-4-6(5)10;1-2;/h1-4,10H,(H,8,9);1H2,2H3;/q;;+1/p-1	CC[Hg]SC1=CC=CC=C1C(O)=O	C9H10HgO2S			67361.0	46506518.0	33214.0		EMT	60691.0	50366032.0	HXQVQGWHFRNKMS	1110	67361.0			HXQVQGWHFRNKMS-UHFFFAOYSA-M
DB03138	Perchlorate	14797-73-0	experimental	VLTRZXGMWDSKGL-UHFFFAOYSA-M	InChI=1S/ClHO4/c2-1(3,4)5/h(H,2,3,4,5)/p-1	[O-][Cl](=O)(=O)=O	ClO4			123351.0	46506970.0	49706.0		LCP	109953.0	36131.0	VLTRZXGMWDSKGL	292	24247.0	Perchloric Acid		VLTRZXGMWDSKGL-UHFFFAOYSA-N
DB01190	Clindamycin	18323-44-9	approved; vet_approved	KDLRVYVGXIQJDK-NOWPCOIGSA-N	InChI=1S/C18H33ClN2O5S/c1-5-6-10-7-11(21(3)8-10)17(25)20-12(9(2)19)16-14(23)13(22)15(24)18(26-16)27-4/h9-16,18,22-24H,5-8H2,1-4H3,(H,20,25)/t9?,10-,11+,12?,13+,14-,15-,16-,18-/m1/s1	CCC[C@@H]1C[C@H](N(C)C1)C(=O)NC(C(C)Cl)[C@H]1O[C@H](SC)[C@H](O)[C@@H](O)[C@H]1O	C18H33ClN2O5S	C06914	D00277	446598.0	46506073.0	3745.0	CHEMBL376185	CLY	27005.0		KDLRVYVGXIQJDK	12	29029.0	Clindamycin	Enzyme Inhibitors;Anti-Infective Agents;Pharmacologic Actions;Molecular Mechanisms of Pharmacological Action;Anti-Bacterial Agents;Chemical Actions and Uses;Protein Synthesis Inhibitors;Therapeutic Uses	KDLRVYVGXIQJDK-NOWPCOIGSA-N
DB06894	1-DODECANOL		experimental	LQZZUXJYWNFBMV-UHFFFAOYSA-N	InChI=1S/C12H26O/c1-2-3-4-5-6-7-8-9-10-11-12-13/h13H,2-12H2,1H3	CCCCCCCCCCCCO	C12H26O	C02277		8193.0	99443365.0	28878.0	CHEMBL24722	1DO	7901.0		LQZZUXJYWNFBMV	3164	8193.0	Dodecanol		LQZZUXJYWNFBMV-UHFFFAOYSA-N
DB04106	Fotemustine		experimental; investigational	YAKWPXVTIGTRJH-QMMMGPOBSA-N	InChI=1S/C9H19ClN3O5P/c1-4-17-19(16,18-5-2)8(3)11-9(14)13(12-15)7-6-10/h8H,4-7H2,1-3H3,(H,11,14)/t8-/m0/s1	CCOP(=O)(OCC)[C@@H](C)NC(=O)N(CCCl)N=O	C9H19ClN3O5P			46936889.0	46505097.0	131854.0			26330202.0		YAKWPXVTIGTRJH	1665	104799.0	fotemustine	Chemical Actions and Uses;Antineoplastic Agents;Therapeutic Uses;Pharmacologic Actions	YAKWPXVTIGTRJH-UHFFFAOYSA-N
DB07450	(R)-minalrestat		experimental	BMHZAHGTGIZZCT-LJQANCHMSA-N	InChI=1S/C19H11BrF2N2O4/c20-10-2-1-9(14(22)5-10)8-24-16(26)12-4-3-11(21)6-13(12)19(18(24)28)7-15(25)23-17(19)27/h1-6H,7-8H2,(H,23,25,27)/t19-/m1/s1	[H]N1C(=O)C[C@@]2(C1=O)C(=O)N(CC1=C(F)C=C(Br)C=C1)C(=O)C1=C2C=C(F)C=C1	C19H11BrF2N2O4			447950.0	99443921.0		CHEMBL292963	BFI	394897.0	50038843.0	BMHZAHGTGIZZCT	3754	190816.0	minalrestat		BMHZAHGTGIZZCT-UHFFFAOYSA-N
DB08084	IDD594		experimental	JCZUIWYXULSXSW-UHFFFAOYSA-N	InChI=1S/C16H12BrF2NO3S/c17-10-2-1-9(13(19)5-10)7-20-16(24)12-4-3-11(18)6-14(12)23-8-15(21)22/h1-6H,7-8H2,(H,20,24)(H,21,22)	OC(=O)COC1=CC(F)=CC=C1C(=S)NCC1=CC=C(Br)C=C1F	C16H12BrF2NO3S			4369325.0	99444555.0		CHEMBL395347	LDT	3571927.0	16313.0	JCZUIWYXULSXSW	1575	4369325.0	Idd 594		JCZUIWYXULSXSW-UHFFFAOYSA-N
DB01124	Tolbutamide	64-77-7	approved; investigational	JLRGJRBPOGGCBT-UHFFFAOYSA-N	InChI=1S/C12H18N2O3S/c1-3-4-9-13-12(15)14-18(16,17)11-7-5-10(2)6-8-11/h5-8H,3-4,9H2,1-2H3,(H2,13,14,15)	CCCCNC(=O)NS(=O)(=O)C1=CC=C(C)C=C1	C12H18N2O3S	C07148	D00380	5505.0	46508421.0	27999.0	CHEMBL782		5304.0	50027886.0	JLRGJRBPOGGCBT	1902	5505.0	Tolbutamide	Physiological Effects of Drugs;Chemical Actions and Uses;Hypoglycemic Agents;Pharmacologic Actions	JLRGJRBPOGGCBT-UHFFFAOYSA-N
DB01120	Gliclazide	21187-98-4	approved	BOVGTQGAOIONJV-UHFFFAOYSA-N	InChI=1S/C15H21N3O3S/c1-11-5-7-14(8-6-11)22(20,21)17-15(19)16-18-9-12-3-2-4-13(12)10-18/h5-8,12-13H,2-4,9-10H2,1H3,(H2,16,17,19)	CC1=CC=C(C=C1)S(=O)(=O)NC(=O)NN1CC2CCCC2C1	C15H21N3O3S		D01599	3475.0	46505475.0	31654.0	CHEMBL427216		3356.0	50103512.0	BOVGTQGAOIONJV	2228	3475.0	Gliclazide	Pharmacologic Actions;Physiological Effects of Drugs;Chemical Actions and Uses;Hypoglycemic Agents	BOVGTQGAOIONJV-UHFFFAOYSA-N
DB01683	Chymostatin	9076-44-2	experimental	MRXDGVXSWIXTQL-LROMGURASA-N	InChI=1S/C31H41N7O6/c1-19(2)15-24(27(40)34-22(18-39)16-20-9-5-3-6-10-20)35-28(41)26(23-13-14-33-30(32)36-23)38-31(44)37-25(29(42)43)17-21-11-7-4-8-12-21/h3-12,18-19,22-26H,13-17H2,1-2H3,(H,34,40)(H,35,41)(H,42,43)(H3,32,33,36)(H2,37,38,44)/t22-,23-,24-,25-,26-/m0/s1	[H][C@](CC1=CC=CC=C1)(C=O)N=C(O)[C@]([H])(CC(C)C)N=C(O)[C@@]([H])(NC(O)=N[C@@]([H])(CC1=CC=CC=C1)C(O)=O)[C@]1([H])CCNC(=N)N1	C31H41N7O6	C11308		5287931.0	46507872.0				4450198.0	50210112.0	MRXDGVXSWIXTQL	532	443119.0	chymostatin	Serine Proteinase Inhibitors;Protease Inhibitors;Enzyme Inhibitors;Molecular Mechanisms of Pharmacological Action;Chemical Actions and Uses;Pharmacologic Actions	MRXDGVXSWIXTQL-HYHFHBMOSA-N
DB04253	Tretazicar	21919-05-1	investigational	WOCXQMCIOTUMJV-UHFFFAOYSA-N	InChI=1S/C9H8N4O5/c10-9(14)5-3-7(11-1-2-11)8(13(17)18)4-6(5)12(15)16/h3-4H,1-2H2,(H2,10,14)	NC(=O)C1=CC(N2CC2)=C(C=C1[N+]([O-])=O)[N+]([O-])=O	C9H8N4O5			89105.0	46509068.0		CHEMBL23330	CB1	80403.0	50004681.0	WOCXQMCIOTUMJV	3738	89105.0	tretazicar	Chemical Actions and Uses;Therapeutic Uses;Radiation-Sensitizing Agents;Antineoplastic Agents;Pharmacologic Actions	WOCXQMCIOTUMJV-UHFFFAOYSA-N
DB02518	N-Acetylalanine	97-69-8	experimental	KTHDTJVBEPMMGL-VKHMYHEASA-N	InChI=1S/C5H9NO3/c1-3(5(8)9)6-4(2)7/h3H,1-2H3,(H,6,7)(H,8,9)/t3-/m0/s1	C[C@H](NC(C)=O)C(O)=O	C5H9NO3			88064.0	46504953.0	40992.0		AYA	79449.0		KTHDTJVBEPMMGL	2880	7345.0	N-acetylalanine		KTHDTJVBEPMMGL-UHFFFAOYSA-N
DB02101	(S,R)-fidarestat		experimental	WAAPEIZFCHNLKK-QPUJVOFHSA-N	InChI=1S/C12H10FN3O4/c13-5-1-2-7-6(3-5)12(4-8(20-7)9(14)17)10(18)15-11(19)16-12/h1-3,8H,4H2,(H2,14,17)(H2,15,16,18,19)/t8-,12+/m0/s1	[H][C@]1(C[C@@]2(N=C(O)N=C2O)C2=C(O1)C=CC(F)=C2)C(O)=N	C12H10FN3O4			449157.0	46506217.0		CHEMBL189464	FIS	395766.0	50151407.0	WAAPEIZFCHNLKK	25	3349.0			WAAPEIZFCHNLKK-UHFFFAOYSA-N
DB12731	Daporinad	658084-64-1	investigational	KPBNHDGDUADAGP-VAWYXSNFSA-N	InChI=1S/C24H29N3O2/c28-23(12-11-21-8-6-15-25-19-21)26-16-5-4-7-20-13-17-27(18-14-20)24(29)22-9-2-1-3-10-22/h1-3,6,8-12,15,19-20H,4-5,7,13-14,16-18H2,(H,26,28)/b12-11+	O=C(NCCCCC1CCN(CC1)C(=O)C1=CC=CC=C1)\C=C\C1=CC=CN=C1	C24H29N3O2			6914657.0	347828925.0		CHEMBL566757	DGB	5290535.0	81395.0	KPBNHDGDUADAGP	985	6914657.0	N-(4-(1-benzoylpiperidin-4-yl)butyl)-3-(pyridin-3-yl)acrylamide		KPBNHDGDUADAGP-VAWYXSNFSA-N
DB00806	Pentoxifylline	6493-05-6	approved; investigational	BYPFEZZEUUWMEJ-UHFFFAOYSA-N	InChI=1S/C13H18N4O3/c1-9(18)6-4-5-7-17-12(19)10-11(14-8-15(10)2)16(3)13(17)20/h8H,4-7H2,1-3H3	CN1C=NC2=C1C(=O)N(CCCCC(C)=O)C(=O)N2C	C13H18N4O3	C07424	D00501	4740.0	46505940.0	7986.0	CHEMBL628	PNX	4578.0	10850.0	BYPFEZZEUUWMEJ	2305	4740.0	Pentoxifylline	Specialty Uses of Chemicals;Hematologic Agents;Enzyme Inhibitors;Protective Agents;Platelet Aggregation Inhibitors;Phosphodiesterase Inhibitors;Radiation-Protective Agents;Physiological Effects of Drugs;Antioxidants;Chemical Actions and Uses;Therapeutic Uses;Cardiovascular Agents;Molecular Mechanisms of Pharmacological Action;Pharmacologic Actions;Free Radical Scavengers;Vasodilator Agents	BYPFEZZEUUWMEJ-UHFFFAOYSA-N
DB07778	FAMOXADONE		experimental	PCCSBWNGDMYFCW-QFIPXVFZSA-N	InChI=1S/C22H18N2O4/c1-22(16-12-14-19(15-13-16)27-18-10-6-3-7-11-18)20(25)24(21(26)28-22)23-17-8-4-2-5-9-17/h2-15,23H,1H3/t22-/m0/s1	C[C@]1(OC(=O)N(NC2=CC=CC=C2)C1=O)C1=CC=C(OC2=CC=CC=C2)C=C1	C22H18N2O4			446845.0	99444249.0	106738.0	CHEMBL10118	FMX	394094.0		PCCSBWNGDMYFCW	726	213032.0	famoxadone		PCCSBWNGDMYFCW-UHFFFAOYSA-N
